# Supplementary material
Source: MDPI journal article supplement (https://www.mdpi.com/2673-8015/2/4/27)
Supplement: s1 [file s1]

**Supplementary Information: An ab initio investigation of the hydration of tin(II)**

Cory C. Pye\* and C. Mahesh Gunasekara

**Table S1: Total Energies of Aquatin(II) Species** (Hartrees, bold indicates a minimum energy structure)

|                                                                        | HF/CEP-4G (6d)                             | HF/CEP-31G*(6d)                            | HF/CEP-121G* (6d)                          |
|------------------------------------------------------------------------|--------------------------------------------|--------------------------------------------|--------------------------------------------|
| $\text{Sn}^{2+} K_h$                                                   | <b>-2.4976820</b>                          | <b>-2.4976820</b>                          | <b>-2.4976820</b>                          |
| $\text{Sn}(\text{H}_2\text{O})_2^{2+} C_{2v}$                          | <b>-19.3834241</b>                         | <b>-19.4471757</b>                         | <b>-19.451076</b>                          |
| $\text{Sn}(\text{H}_2\text{O})_2^{2+} D_{2d}$                          | -36.2134449                                | -36.3617869                                | -36.3691509                                |
| $\text{Sn}(\text{H}_2\text{O})_2^{2+} C_s$                             | -36.2513972                                | -36.3811994                                | -36.3891625                                |
| $\text{Sn}(\text{H}_2\text{O})_2^{2+} C_2$                             | <b>-36.2519717</b>                         | <b>-36.3814073</b>                         | <b>-36.3893273</b>                         |
| $\text{Sn}(\text{H}_2\text{O})_2^{2+} + \text{H}_2\text{O} C_s$        | $\text{SnOH}^+ + \text{H}_3\text{O}^+ C_s$ | $\text{SnOH}^+ + \text{H}_3\text{O}^+ C_s$ | $\text{SnOH}^+ + \text{H}_3\text{O}^+ C_s$ |
| $\text{SnOH}^+ + \text{H}_3\text{O}^+ C_s$                             | <b>-36.2314652</b>                         | <b>-36.3665039</b>                         | <b>-36.3745943</b>                         |
| $\text{Sn}(\text{H}_2\text{O})_3^{2+} D_{3h} \#1$                      | -53.0535749                                | -53.2749324                                | -53.2859914                                |
| $\text{Sn}(\text{H}_2\text{O})_3^{2+} D_{3h} \#2$                      | -53.0552289                                | -53.2749108                                | -53.2858423                                |
| $\text{Sn}(\text{H}_2\text{O})_3^{2+} D_3$                             | -53.0554227                                | -53.2758017                                | -53.2868508                                |
| $\text{Sn}(\text{H}_2\text{O})_3^{2+} C_{3v} \#1$                      | -53.1041536                                | -53.2985224                                | -53.3101763                                |
| $\text{Sn}(\text{H}_2\text{O})_3^{2+} C_{3v} \#2$                      | -53.0985720                                | -53.2954865                                | -53.3071799                                |
| $\text{Sn}(\text{H}_2\text{O})_3^{2+} C_3$                             | <b>-53.1066883</b>                         | <b>-53.3034407</b>                         | <b>-53.3155297</b>                         |
| $\text{Sn}(\text{H}_2\text{O})_2^{2+} + \text{H}_2\text{O} C_{2v}$     | -53.0831007                                | <b>-53.2870511</b>                         | <b>-53.2985935</b>                         |
| $\text{Sn}(\text{H}_2\text{O})_2^{2+} + \text{H}_2\text{O} C_s$        | <b>-53.0852889</b>                         | n/a                                        | n/a                                        |
| $\text{Sn}(\text{H}_2\text{O})_4^{2+} D_{2d} \#1$                      | -69.8854387                                | -70.1788927                                | -70.1934987                                |
| $\text{Sn}(\text{H}_2\text{O})_4^{2+} D_{2d} \#2$                      | -69.8853439                                | -70.1787422                                | -70.1933516                                |
| $\text{Sn}(\text{H}_2\text{O})_4^{2+} D_2$                             | $D_{2d} \#1$                               | -70.1790514                                | -70.1936992                                |
| $\text{Sn}(\text{H}_2\text{O})_4^{2+} S_4$                             | -69.8859666                                | -70.1796809                                | -70.1943981                                |
| $\text{Sn}(\text{H}_2\text{O})_4^{2+} C_{2v} \#1$                      | -69.9222323                                | -70.1969552                                | -70.2123090                                |
| $\text{Sn}(\text{H}_2\text{O})_4^{2+} C_{2v} \#2$                      | -69.9233806                                | -70.1958500                                | -70.2111450                                |
| $\text{Sn}(\text{H}_2\text{O})_4^{2+} C_{2v} \#3$                      | -69.9285829                                | -70.2020357                                | -70.2175340                                |
| $\text{Sn}(\text{H}_2\text{O})_4^{2+} C_2$                             | <b>-69.9286022</b>                         | <b>-70.2021062</b>                         | <b>-70.2176852</b>                         |
| $\text{Sn}(\text{H}_2\text{O})_3^{2+} + \text{H}_2\text{O} C_s \#1$    | -69.9274818                                | -70.2000827                                | <b>-70.2158847</b>                         |
| $\text{Sn}(\text{H}_2\text{O})_3^{2+} + \text{H}_2\text{O} C_s \#2$    | -69.9286969                                | <b>-70.2009104</b>                         | <b>-70.2166196</b>                         |
| $\text{Sn}(\text{H}_2\text{O})_3^{2+} + \text{H}_2\text{O} C_I \#2$    | <b>-69.9318203</b>                         | n/a                                        | n/a                                        |
| $\text{Sn}(\text{H}_2\text{O})_5^{2+} C_{2v} \#1$                      | -86.7405151                                | -87.0953573                                | -87.1145853                                |
| $\text{Sn}(\text{H}_2\text{O})_5^{2+} C_{2v} \#2$                      | -86.7305692                                | -87.0853187                                | -87.1041995                                |
| $\text{Sn}(\text{H}_2\text{O})_5^{2+} C_{2v} \#3$                      | -86.7341384                                | -87.0852413                                | -87.1038539                                |
| $\text{Sn}(\text{H}_2\text{O})_5^{2+} C_{2v} \#4$                      | -86.7311648                                | -87.0842526                                | -87.1029393                                |
| $\text{Sn}(\text{H}_2\text{O})_5^{2+} C_s \#1$                         | [4+1]                                      | <b>-87.0953722</b>                         | <b>-87.1146106</b>                         |
| $\text{Sn}(\text{H}_2\text{O})_4^{2+} + \text{H}_2\text{O} C_{2v} \#1$ | -86.7431707                                | -87.0929515                                | -87.1121303                                |
| $\text{Sn}(\text{H}_2\text{O})_4^{2+} + \text{H}_2\text{O} C_{2v} \#2$ | -86.7414078                                | -87.0920399                                | -87.1113562                                |
| $\text{Sn}(\text{H}_2\text{O})_4^{2+} + \text{H}_2\text{O} C_2 \#1$    | n/a                                        | -87.0932092                                | -87.1125601                                |
| $\text{Sn}(\text{H}_2\text{O})_4^{2+} + \text{H}_2\text{O} C_s \#1$    | <b>-86.7432960</b>                         | -87.0929977                                | -87.1121727                                |
| $\text{Sn}(\text{H}_2\text{O})_4^{2+} + \text{H}_2\text{O} C_s \#2$    | -86.7437804                                | <b>-87.0945197</b>                         | <b>-87.1139350</b>                         |
| $\text{Sn}(\text{H}_2\text{O})_4^{2+} + \text{H}_2\text{O} C_I \#2$    | <b>-86.7480007</b>                         | n/a                                        | n/a                                        |
| $\text{Sn}(\text{H}_2\text{O})_5^{2+} C_s [4+1]$                       | <b>-86.7496935</b>                         | <b>-87.0949666</b>                         | <b>-87.1142566</b>                         |
| $\text{Sn}(\text{H}_2\text{O})_3^{2+} + 2\text{H}_2\text{O} C_s \#1$   | <b>-86.7431609</b>                         | <b>-87.0907782</b>                         | <b>-87.1103930</b>                         |

|                                                                         | HF/CEP-4G (6d)      | HF/CEP-31G*(6d)     | HF/CEP-121G* (6d)   |
|-------------------------------------------------------------------------|---------------------|---------------------|---------------------|
| $\text{Sn}(\text{H}_2\text{O})_6^{2+} T_h$                              | -103.5184256        | -103.9659040        | -103.9883122        |
| $\text{Sn}(\text{H}_2\text{O})_6^{2+} C_3$                              | [3+3]               | <b>-103.9781668</b> | <b>-104.0012817</b> |
| $\text{Sn}(\text{H}_2\text{O})_5^{2+} + \text{H}_2\text{O} C_s \#1$     | -103.5514850        | -103.9787634        | -104.0012949        |
| $\text{Sn}(\text{H}_2\text{O})_5^{2+} + \text{H}_2\text{O} C_s \#2$     | <b>-103.5541494</b> | <b>-103.9844125</b> | <b>-104.0072757</b> |
| $\text{Sn}(\text{H}_2\text{O})_4^{2+} + 2\text{H}_2\text{O} C_{2v} \#1$ | -103.5480427        | -103.9798195        | -104.0023692        |
| $\text{Sn}(\text{H}_2\text{O})_4^{2+} + 2\text{H}_2\text{O} C_2 \#1$    | -103.5630470        | <b>-103.9890809</b> | <b>-104.0122594</b> |
| $\text{Sn}(\text{H}_2\text{O})_4^{2+} + 2\text{H}_2\text{O} C_s \#1$    | -103.5583146        | <b>-103.9816992</b> | -104.0047619        |
| $\text{Sn}(\text{H}_2\text{O})_4^{2+} + 2\text{H}_2\text{O} C_s \#2$    | -103.5587732        | <b>-103.9849344</b> | <b>-104.0081441</b> |
| $\text{Sn}(\text{H}_2\text{O})_3^{2+} + 3\text{H}_2\text{O} C_{3v} \#1$ | -103.5464789        | <b>-103.9758716</b> | <b>-103.9997380</b> |
| $\text{Sn}(\text{H}_2\text{O})_3^{2+} + 3\text{H}_2\text{O} C_3 \#1$    | -103.5583515        | n/a                 | n/a                 |
| $\text{Sn}(\text{H}_2\text{O})_6^{2+} C_3 [3+3]$                        | <b>-103.5678612</b> | <b>-103.9794553</b> | <b>-104.0023033</b> |
| $\text{Sn}(\text{H}_2\text{O})_7^{2+} C_{2v} \#1$                       | [5+2]               | [5+2]               | [5+2]               |
| $\text{Sn}(\text{H}_2\text{O})_7^{2+} C_{2v} \#2$                       | [5+2]               | [5+2]               | [5+2]               |
| $\text{Sn}(\text{H}_2\text{O})_7^{2+} C_{2v} \#3$                       | [5+2]               | [5+2]               | [6+1]               |
| $\text{Sn}(\text{H}_2\text{O})_7^{2+} C_{2v} \#4$                       | [5+2]               | [5+2]               | [5+2]               |
| $\text{Sn}(\text{H}_2\text{O})_7^{2+} C_{2v} \#5$                       | -120.3150449        | -120.8314501        | -120.8573659        |
| $\text{Sn}(\text{H}_2\text{O})_7^{2+} C_{2v} \#6$                       | -120.3190256        | -120.8367818        | -120.8627180        |
| $\text{Sn}(\text{H}_2\text{O})_7^{2+} C_{2v} \#7$                       | -120.3147157        | -120.8305532        | -120.8562555        |
| $\text{Sn}(\text{H}_2\text{O})_7^{2+} C_{2v} \#8$                       | -120.3278412        | -120.8438312        | -120.8703080        |
| $\text{Sn}(\text{H}_2\text{O})_7^{2+} C_{2v} \#9$                       | [5+2]               | [5+2]               | [5+2]               |
| $\text{Sn}(\text{H}_2\text{O})_7^{2+} C_{2v} \#10$                      | [5+2]               | -120.8333056        | [5+2]               |
| $\text{Sn}(\text{H}_2\text{O})_7^{2+} C_{2v} \#11$                      | [4+3]               | [6+1]               | [6+1]               |
| $\text{Sn}(\text{H}_2\text{O})_7^{2+} C_{2v} \#12$                      | [5+2]               | [5+2]               | [5+2]               |
| $\text{Sn}(\text{H}_2\text{O})_7^{2+} C_{2v} \#13$                      | [4+3]               | -120.8426599        | -120.8692813        |
| $\text{Sn}(\text{H}_2\text{O})_7^{2+} C_{2v} \#14$                      | [4+3]               | -120.8424404        | [4+3]               |
| $\text{Sn}(\text{H}_2\text{O})_7^{2+} C_{2v} \#15$                      | [4+3]               | -120.8447408        | -120.8714230        |
| $\text{Sn}(\text{H}_2\text{O})_7^{2+} C_{2v} \#16$                      | [5+2]               | -120.8452330        | -120.8714987        |
| $\text{Sn}(\text{H}_2\text{O})_7^{2+} C_{2v} \#1 [5+2]$                 | -120.3507532        | -120.8609829        | -120.8876534        |
| $\text{Sn}(\text{H}_2\text{O})_7^{2+} C_{2v} \#2 [5+2]$                 | -120.3433698        | -120.8511482        | -120.8773714        |
| $\text{Sn}(\text{H}_2\text{O})_7^{2+} C_{2v} \#3 [5+2]$                 | -120.3433635        | -120.8494953        | 120.8755932         |
| $\text{Sn}(\text{H}_2\text{O})_7^{2+} C_{2v} \#4 [5+2]$                 | -120.3451163        | -120.8510203        | -120.8771806        |
| $\text{Sn}(\text{H}_2\text{O})_7^{2+} C_{2v} \#9 [5+2]$                 | -120.3499502        | -120.8590936        | -120.8856083        |
| $\text{Sn}(\text{H}_2\text{O})_7^{2+} C_{2v} \#10 [5+2]$                | -120.3420870        | -120.8485514        | -120.8745535        |
| $\text{Sn}(\text{H}_2\text{O})_7^{2+} C_{2v} \#11 [5+2]$                |                     |                     |                     |
| $\text{Sn}(\text{H}_2\text{O})_7^{2+} C_{2v} \#12 [5+2]$                | -120.3431742        | -120.8474987        | -120.8734204        |
| $\text{Sn}(\text{H}_2\text{O})_7^{2+} C_2 \#5$                          | [5+2]               | [5+2]               | [5+2]               |
| $\text{Sn}(\text{H}_2\text{O})_7^{2+} C_2 \#6$                          | [5+2]               | [5+2]               | [5+2]               |
| $\text{Sn}(\text{H}_2\text{O})_7^{2+} C_2 \#7$                          | [5+2]               | [5+2]               | [5+2]               |
| $\text{Sn}(\text{H}_2\text{O})_7^{2+} C_2 \#8$                          | [5+2]               | [5+2]               | [5+2]               |
| $\text{Sn}(\text{H}_2\text{O})_7^{2+} C_2 \#10$                         | n/a                 | -120.8462544        | n/a                 |
| $\text{Sn}(\text{H}_2\text{O})_7^{2+} C_2 \#13$                         | n/a                 | $C_2 \#15$          | [4+3]               |
| $\text{Sn}(\text{H}_2\text{O})_7^{2+} C_2 \#14$                         | n/a                 | $C_2 \#15$          | n/a                 |
| $\text{Sn}(\text{H}_2\text{O})_7^{2+} C_2 \#15$                         | n/a                 | -120.8473088        | [5+2]               |
| $\text{Sn}(\text{H}_2\text{O})_7^{2+} C_2 \#16$                         | n/a                 | [5+2]               | [5+2]               |

|                                                   | HF/CEP-4G (6d) | HF/CEP-31G*(6d) | HF/CEP-121G* (6d) |
|---------------------------------------------------|----------------|-----------------|-------------------|
| $\text{Sn}(\text{H}_2\text{O})_8^{2+} D_{4h} \#1$ | -137.0916423   | -137.6920082    | -137.7207007      |
| $\text{Sn}(\text{H}_2\text{O})_8^{2+} D_{4h} \#2$ | -137.0917640   | -137.6921976    | -137.7209488      |
| $\text{Sn}(\text{H}_2\text{O})_8^{2+} D_{4d} \#1$ | -137.1069771   | -137.7109686    | -137.7403521      |
| $\text{Sn}(\text{H}_2\text{O})_8^{2+} D_{4d} \#2$ | -137.1055061   | -137.7097560    | -137.7386785      |
| $\text{Sn}(\text{H}_2\text{O})_8^{2+} D_4 \#1$    | $D_4 \#2$      | n/a             | n/a               |
| $\text{Sn}(\text{H}_2\text{O})_8^{2+} D_4 \#2$    | -137.1128956   | -137.7200850    | -137.7502337      |
| $\text{Sn}(\text{H}_2\text{O})_8^{2+} D_4 \#3$    | $D_4 \#2$      | $D_4 \#2$       | $D_4 \#2$         |
| $\text{Sn}(\text{H}_2\text{O})_8^{2+} D_4 \#4$    | $D_4 \#2$      | $D_4 \#2$       | $D_4 \#2$         |
| $\text{Sn}(\text{H}_2\text{O})_8^{2+} C_{4h} \#1$ | -137.1082453   | -137.7171293    | -137.7474312      |
| $\text{Sn}(\text{H}_2\text{O})_8^{2+} C_{4h} \#2$ | $C_{4h} \#1$   | $C_{4h} \#1$    | $C_{4h} \#1$      |
| $\text{Sn}(\text{H}_2\text{O})_8^{2+} C_{4v} \#1$ | -137.1175902   | n/a             | n/a               |
| $\text{Sn}(\text{H}_2\text{O})_8^{2+} C_{4v} \#2$ | [4+4]          | n/a             | n/a               |
| $\text{Sn}(\text{H}_2\text{O})_8^{2+} C_{4v} \#3$ | [4+4]          | n/a             | n/a               |
| $\text{Sn}(\text{H}_2\text{O})_8^{2+} C_{4v} \#4$ | -137.0930142   | n/a             | n/a               |
| $\text{Sn}(\text{H}_2\text{O})_8^{2+} S_8 \#1$    | -137.1161257   | -137.7236543    | -137.7533251      |
| $\text{Sn}(\text{H}_2\text{O})_8^{2+} S_8 \#2$    | $S_8 \#1$      | $S_8 \#1$       | $S_8 \#1$         |
| $\text{Sn}(\text{H}_2\text{O})_8^{2+} D_{2d} \#1$ | -137.1021904   | -137.7073334    | -137.7368372      |
| $\text{Sn}(\text{H}_2\text{O})_8^{2+} D_{2d} \#2$ | -137.1033734   | -137.7059272    | -137.7348490      |
| $\text{Sn}(\text{H}_2\text{O})_8^{2+} D_{2d} \#3$ | $D_{2d} \#1$   | $D_{2d} \#1$    | $D_{2d} \#1$      |
| $\text{Sn}(\text{H}_2\text{O})_8^{2+} D_{2d} \#4$ | -137.1037657   | -137.7062567    | -137.7356012      |
| $\text{Sn}(\text{H}_2\text{O})_8^{2+} D_{2d} \#5$ | -137.1121360   | -137.7194401    | -137.7493279      |
| $\text{Sn}(\text{H}_2\text{O})_8^{2+} D_{2h} \#1$ | $D_{4h} \#2$   | $D_{4h} \#2$    | $D_{4h} \#2$      |
| $\text{Sn}(\text{H}_2\text{O})_8^{2+} D_{2h} \#3$ | -137.1062596   | -137.7127311    | -137.7423831      |
| $\text{Sn}(\text{H}_2\text{O})_8^{2+} D_{2h} \#4$ | $D_{2h} \#3$   | $D_{2h} \#3$    | $D_{2h} \#3$      |
| $\text{Sn}(\text{H}_2\text{O})_8^{2+} C_{2v} \#1$ | [4+4]          | -137.7172126    | -137.7468867      |
| $\text{Sn}(\text{H}_2\text{O})_8^{2+} C_{2v} \#2$ | [4+4]          | $C_{2v} \#1$    | $C_{2v} \#1$      |
| $\text{Sn}(\text{H}_2\text{O})_8^{2+} C_{2v} \#3$ | [4+4]          | [4+4]           | [4+4]             |
| $\text{Sn}(\text{H}_2\text{O})_8^{2+} C_{2v} \#4$ | [4+4]          | n/a             | n/a               |
| $\text{Sn}(\text{H}_2\text{O})_8^{2+} C_{2v} \#5$ | [6+2]          | n/a             | n/a               |
| $\text{Sn}(\text{H}_2\text{O})_8^{2+} C_{2v} \#6$ | [6+2]          | [6+2]           | [6+2]             |
| $\text{Sn}(\text{H}_2\text{O})_8^{2+} C_4 \#1$    | [4+4]          | [4+4]           | [4+4]             |
| $\text{Sn}(\text{H}_2\text{O})_8^{2+} C_4 \#2$    | [4+4]          | n/a             | n/a               |
| $\text{Sn}(\text{H}_2\text{O})_8^{2+} C_4 \#3$    | [4+4]          | [4+4]           | [4+4]             |
| $\text{Sn}(\text{H}_2\text{O})_8^{2+} S_4 \#1$    | -137.1121360   | n/a             | n/a               |
| $\text{Sn}(\text{H}_2\text{O})_8^{2+} S_4 \#2$    | -137.1120004   | -137.7188204    | -137.7489013      |
| $\text{Sn}(\text{H}_2\text{O})_8^{2+} S_4 \#3$    | $S_4 \#2$      | $S_4 \#2$       | $S_4 \#2$         |
| $\text{Sn}(\text{H}_2\text{O})_8^{2+} S_4 \#4$    | $S_4 \#2$      | $D_{2d} \#5$    | $D_{2d} \#5$      |
| $\text{Sn}(\text{H}_2\text{O})_8^{2+} D_2 \#1$    | -137.1136552   | n/a             | n/a               |
| $\text{Sn}(\text{H}_2\text{O})_8^{2+} D_2 \#2$    | $D_2 \#1$      | -137.7196880    | $D_4 \#2$         |
| $\text{Sn}(\text{H}_2\text{O})_8^{2+} D_2 \#3$    | $D_2 \#1$      | $D_2 \#2$       | $D_4 \#2$         |
| $\text{Sn}(\text{H}_2\text{O})_8^{2+} D_2 \#4$    | $D_2 \#1$      | $D_4 \#2$       | $D_4 \#2$         |
| $\text{Sn}(\text{H}_2\text{O})_8^{2+} D_2 \#5$    | $D_2 \#1$      | $D_4 \#2$       | $D_4 \#2$         |
| $\text{Sn}(\text{H}_2\text{O})_8^{2+} D_2 \#7$    | $D_4 \#2$      | $D_4 \#2$       | $D_4 \#2$         |
| $\text{Sn}(\text{H}_2\text{O})_8^{2+} C_{2h} \#2$ | $C_{4h} \#1$   | $C_{4h} \#1$    | $C_{4h} \#1$      |

|                                                         |                     |                     |                     |
|---------------------------------------------------------|---------------------|---------------------|---------------------|
| $\text{Sn}(\text{H}_2\text{O})_8^{2+} C_2 \#1$          | n/a                 | [4+4]               | [4+4]               |
| $\text{Sn}(\text{H}_2\text{O})_8^{2+} C_2 \#6$          | [4+2+2]             | [4+4]               | [6+2]               |
| $\text{Sn}(\text{H}_2\text{O})_8^{2+} C_2 \#8$          | [4+4]               | n/a                 | n/a                 |
| $\text{Sn}(\text{H}_2\text{O})_8^{2+} C_2 \#9$          | n/a                 | [4+4]               | n/a                 |
|                                                         | HF/CEP-4G (6d)      | HF/CEP-31G*(6d)     | HF/CEP-121G* (6d)   |
| $\text{Sn}(\text{H}_2\text{O})_9^{2+} D_{3h} \#1$       | -153.8970798        | -154.5809886        | -154.6141191        |
| $\text{Sn}(\text{H}_2\text{O})_9^{2+} D_{3h} \#2$       | -153.8825396        | -154.5599663        | -154.5925006        |
| $\text{Sn}(\text{H}_2\text{O})_9^{2+} D_{3h} \#3$       | -153.8869544        | -154.5676578        | -154.6008449        |
| $\text{Sn}(\text{H}_2\text{O})_9^{2+} D_{3h} \#4$       | -153.8990692        | -154.5839746        | -154.6171675        |
| $\text{Sn}(\text{H}_2\text{O})_9^{2+} D_3 \#1$          | -153.9043313        | -154.5920425        | -154.6256192        |
| $\text{Sn}(\text{H}_2\text{O})_9^{2+} D_3 \#2$          | $D_3 \#1$           | $D_3 \#1$           | $D_3 \#1$           |
| $\text{Sn}(\text{H}_2\text{O})_9^{2+} D_3 \#3$          | $D_3 \#1$           | [6+3]               | [6+3]               |
| $\text{Sn}(\text{H}_2\text{O})_9^{2+} D_3 \#4$          | $D_3 \#1$           | $D_3 \#1$           | $D_3 \#1$           |
| $\text{Sn}(\text{H}_2\text{O})_9^{2+} D_3 [6+3]$        | -153.9216208        | -154.6141129        | -154.6480905        |
| $\text{Sn}(\text{H}_2\text{O})_9^{2+} C_{3h} \#1$       | -153.9012495        | -154.5883577        | -154.6218005        |
| $\text{Sn}(\text{H}_2\text{O})_9^{2+} C_{3h} \#2$       | -153.9014039        | -154.5868623        | -154.6200976        |
| $\text{Sn}(\text{H}_2\text{O})_9^{2+} C_{3h} \#3$       | $C_{3h} \#1$        | $C_{3h} \#1$        | $C_{3h} \#1$        |
| $\text{Sn}(\text{H}_2\text{O})_9^{2+} C_{3h} \#4$       | $C_{3h} \#2$        | $C_{3h} \#2$        | $C_{3h} \#2$        |
| $\text{Sn}(\text{H}_2\text{O})_9^{2+} C_{3v} \#1$       | [6+3]               | $D_{3h} \#1$        | $D_{3h} \#1$        |
| $\text{Sn}(\text{H}_2\text{O})_9^{2+} C_{3v} \#2$       | [6+3]               | [6+3]               | [6+3]               |
| $\text{Sn}(\text{H}_2\text{O})_9^{2+} C_{3v} \#3$       | [6+3]               | [6+3]               | [6+3]               |
| $\text{Sn}(\text{H}_2\text{O})_9^{2+} C_{3v} \#4$       | -153.9099261        | -154.5839750        | -154.6172324        |
| $\text{Sn}(\text{H}_2\text{O})_9^{2+} C_{3v} \#2 [6+3]$ | -153.9438890        | -154.5981505        | -154.6314686        |
| $\text{Sn}(\text{H}_2\text{O})_9^{2+} C_{3v} \#3 [6+3]$ | -153.9259339        | -154.5981562        | -154.6329234        |
| $\text{Sn}(\text{H}_2\text{O})_9^{2+} C_3 \#1$          | [6+3], then [3+3+3] | $C_3 \#1 [6+3]$     | $C_3 \#1 [6+3]$     |
| $\text{Sn}(\text{H}_2\text{O})_9^{2+} C_3 \#2$          | [6+3], then [3+3+3] | $C_3 \#1 [6+3]$     | $C_3 \#3 [6+3]$     |
| $\text{Sn}(\text{H}_2\text{O})_9^{2+} C_3 \#3$          | [3+3+3]             | $C_3 \#3 [6+3]$     | $C_3 \#3 [6+3]$     |
| $\text{Sn}(\text{H}_2\text{O})_9^{2+} C_3 \#4$          | n/a                 | $C_3 \#1 [6+3]$     | $C_3 \#1 [6+3]$     |
| $\text{Sn}(\text{H}_2\text{O})_9^{2+} C_3 \#5$          | [6+3], then [3+3+3] | $C_3 \#1 [6+3]$     | $C_3 \#1 [6+3]$     |
| $\text{Sn}(\text{H}_2\text{O})_9^{2+} C_3 \#1 [6+3]$    | n/a                 | <b>-154.6117308</b> | <b>-154.6461228</b> |
| $\text{Sn}(\text{H}_2\text{O})_9^{2+} C_3 \#3 [6+3]$    | n/a                 | <b>-154.6017287</b> | <b>-154.6369464</b> |
| $\text{Sn}(\text{H}_2\text{O})_{18}^{2+} T [6+12]$      | -305.0353548        | -306.4668456        | -306.5371867        |

|                                                                        | HF/LANL2MB (5d)                            | HF/LANL2DZ (5d)                            | HF/SDD (6d)                                |
|------------------------------------------------------------------------|--------------------------------------------|--------------------------------------------|--------------------------------------------|
| $\text{Sn}^{2+} K_h$                                                   | <b>-2.4626155</b>                          | <b>-2.4628587</b>                          | <b>-2.4725025</b>                          |
| $\text{Sn}(\text{H}_2\text{O})^{2+} C_{2v}$                            | <b>-77.5834802</b>                         | <b>-78.5957448</b>                         | <b>-78.5989430</b>                         |
| $\text{Sn}(\text{H}_2\text{O})_2^{2+} D_{2d}$                          | -152.6316254                               | -154.6805982                               | -154.6821858                               |
| $\text{Sn}(\text{H}_2\text{O})_2^{2+} C_s$                             | -152.6845504                               | -154.7068436                               | -154.7051774                               |
| $\text{Sn}(\text{H}_2\text{O})_2^{2+} C_2$                             | (i.p. $C_{2v}$ ) <b>-152.6868650</b>       | <b>-154.7070937</b>                        | <b>-154.7053064</b>                        |
| $\text{Sn}(\text{H}_2\text{O})^{2+} + \text{H}_2\text{O} C_s$          | $\text{SnOH}^+ + \text{H}_3\text{O}^+ C_s$ | $\text{SnOH}^+ + \text{H}_3\text{O}^+ C_s$ | $\text{SnOH}^+ + \text{H}_3\text{O}^+ C_s$ |
| $\text{SnOH}^+ + \text{H}_3\text{O}^+ C_s$                             | <b>-152.6554919</b>                        | <b>154.6931148</b>                         | <b>-154.6904362</b>                        |
| $\text{Sn}(\text{H}_2\text{O})_3^{2+} D_{3h} \#1$                      | -227.6866932                               | -230.7632816                               | -230.7636386                               |
| $\text{Sn}(\text{H}_2\text{O})_3^{2+} D_{3h} \#2$                      | -227.6954459                               | -230.7631326                               | -230.7636101                               |
| $\text{Sn}(\text{H}_2\text{O})_3^{2+} D_3$                             | $D_{3h} \#2$                               | -230.7643214                               | -230.7646327                               |
| $\text{Sn}(\text{H}_2\text{O})_3^{2+} C_{3v} \#1$                      | -227.7731084                               | -230.7973847                               | -230.7918660                               |
| $\text{Sn}(\text{H}_2\text{O})_3^{2+} C_{3v} \#2$                      | -227.7623134                               | -230.7923859                               | -230.7880092                               |
| $\text{Sn}(\text{H}_2\text{O})_3^{2+} C_3$                             | <b>-227.7731643</b>                        | <b>-230.8021235</b>                        | <b>-230.7965443</b>                        |
| $\text{Sn}(\text{H}_2\text{O})_2^{2+} + \text{H}_2\text{O} C_{2v}$     | <b>-227.7455791</b>                        | <b>-230.7870719</b>                        | <b>-230.7832017</b>                        |
| $\text{Sn}(\text{H}_2\text{O})_4^{2+} D_{2d} \#1$                      | -302.7381288                               | -306.8338578                               | -306.8337552                               |
| $\text{Sn}(\text{H}_2\text{O})_4^{2+} D_{2d} \#2$                      | -302.7380715                               | -306.8337348                               | -306.8336536                               |
| $\text{Sn}(\text{H}_2\text{O})_4^{2+} D_2$                             | $D_{2d} \#1$                               | -306.8341441                               | -306.8338267                               |
| $\text{Sn}(\text{H}_2\text{O})_4^{2+} S_4$                             | -302.7386944                               | -306.8349177                               | -306.8346022                               |
| $\text{Sn}(\text{H}_2\text{O})_4^{2+} C_{2v} \#1$                      | -302.8057711                               | -306.8603573                               | -306.8547402                               |
| $\text{Sn}(\text{H}_2\text{O})_4^{2+} C_{2v} \#2$                      | -302.8146823                               | -306.8608890                               | -306.8547556                               |
| $\text{Sn}(\text{H}_2\text{O})_4^{2+} C_{2v} \#3$                      | -302.8161753                               | <b>-306.8679144</b>                        | -306.8612116                               |
| $\text{Sn}(\text{H}_2\text{O})_4^{2+} C_2$                             | -302.8166961                               | n/a                                        | <b>-306.8612335</b>                        |
| $\text{Sn}(\text{H}_2\text{O})_4^{2+} C_s$                             | <b>-302.8178253</b>                        | n/a                                        | n/a                                        |
| $\text{Sn}(\text{H}_2\text{O})_3^{2+} + \text{H}_2\text{O} C_s \#1$    | -302.8155723                               | -306.8707698                               | -306.8638543                               |
| $\text{Sn}(\text{H}_2\text{O})_3^{2+} + \text{H}_2\text{O} C_s \#2$    | <b>-302.8187704</b>                        | <b>-306.8722193</b>                        | <b>-306.8651379</b>                        |
| $\text{Sn}(\text{H}_2\text{O})_5^{2+} C_{2v} \#1$                      | -377.8435705                               | -382.9252031                               | -382.9187846                               |
| $\text{Sn}(\text{H}_2\text{O})_5^{2+} C_{2v} \#2$                      | -377.8279961                               | -382.9116388                               | -382.9069352                               |
| $\text{Sn}(\text{H}_2\text{O})_5^{2+} C_{2v} \#3$                      | -377.8425752                               | -382.9143048                               | -382.9081495                               |
| $\text{Sn}(\text{H}_2\text{O})_5^{2+} C_{2v} \#4$                      | -377.8328574                               | -382.9118302                               | -382.9065311                               |
| $\text{Sn}(\text{H}_2\text{O})_5^{2+} C_s \#1$                         | n/a                                        | [4+1]                                      | [4+1]                                      |
| $\text{Sn}(\text{H}_2\text{O})_5^{2+} C_2$                             | $C_{2v}$ <b>-377.8437618</b>               | n/a                                        | n/a                                        |
| $\text{Sn}(\text{H}_2\text{O})_4^{2+} + \text{H}_2\text{O} C_{2v} \#1$ | <b>-377.8531250</b>                        | -382.9294848                               | -382.9218655                               |
| $\text{Sn}(\text{H}_2\text{O})_4^{2+} + \text{H}_2\text{O} C_{2v} \#2$ | -377.8471287                               | -382.9273404                               | -382.9202837                               |
| $\text{Sn}(\text{H}_2\text{O})_4^{2+} + \text{H}_2\text{O} C_2 \#1$    | n/a                                        | n/a                                        | -382.9218892                               |
| $\text{Sn}(\text{H}_2\text{O})_4^{2+} + \text{H}_2\text{O} C_s \#1$    | n/a                                        | -382.9294932                               | -392.9219212                               |
| $\text{Sn}(\text{H}_2\text{O})_4^{2+} + \text{H}_2\text{O} C_s \#2$    | -377.8509902                               | <b>-382.9305530</b>                        | <b>-392.9229099</b>                        |
| $\text{Sn}(\text{H}_2\text{O})_4^{2+} + \text{H}_2\text{O} C_I \#2$    | <b>-377.8531250</b>                        | n/a                                        | n/a                                        |
| $\text{Sn}(\text{H}_2\text{O})_5^{2+} C_s [4+1]$                       | <b>-377.8542952</b>                        | <b>-382.9331753</b>                        | <b>-382.9249897</b>                        |
| $\text{Sn}(\text{H}_2\text{O})_3^{2+} + 2\text{H}_2\text{O} C_s \#1$   | <b>-377.8431471</b>                        | <b>-382.9309163</b>                        | <b>-382.9231226</b>                        |

|                                                                         | HF/LANL2MB (5d)     | HF/LANL2DZ (5d)     | HF/SDD (6d)         |
|-------------------------------------------------------------------------|---------------------|---------------------|---------------------|
| $\text{Sn}(\text{H}_2\text{O})_6^{2+} T_h$                              | -452.7838912        | -458.9487651        | -458.9477675        |
| $\text{Sn}(\text{H}_2\text{O})_6^{2+} C_3$                              | -452.8439257        | [3+3]               | [3+3]               |
| $\text{Sn}(\text{H}_2\text{O})_5^{2+} + \text{H}_2\text{O} C_s \#1$     | -452.8758478        | -458.9789543        | -458.9714842        |
| $\text{Sn}(\text{H}_2\text{O})_5^{2+} + \text{H}_2\text{O} C_s \#2$     | <b>-452.8759277</b> | <b>-458.9847079</b> | <b>-458.9771795</b> |
| $\text{Sn}(\text{H}_2\text{O})_4^{2+} + 2\text{H}_2\text{O} C_{2v} \#1$ | -452.8749358        | -458.9857764        | -458.9786397        |
| $\text{Sn}(\text{H}_2\text{O})_4^{2+} + 2\text{H}_2\text{O} C_2 \#1$    | <b>-452.8843354</b> | <b>-458.9964446</b> | <b>-458.9874922</b> |
| $\text{Sn}(\text{H}_2\text{O})_4^{2+} + 2\text{H}_2\text{O} C_s \#1$    | -452.8761688        | -458.9871596        | -458.9786425        |
| $\text{Sn}(\text{H}_2\text{O})_4^{2+} + 2\text{H}_2\text{O} C_s \#2$    | <b>-452.8776668</b> | <b>-458.9912546</b> | <b>-458.9826880</b> |
| $\text{Sn}(\text{H}_2\text{O})_3^{2+} + 3\text{H}_2\text{O} C_{3v} \#1$ | -452.8532537        | 458.9822721         | -458.9729986        |
| $\text{Sn}(\text{H}_2\text{O})_3^{2+} + 3\text{H}_2\text{O} C_3 \#1$    | <b>-452.8786065</b> | -458.9862080        | -458.9766731        |
| $\text{Sn}(\text{H}_2\text{O})_6^{2+} C_3 [3+3]$                        | <b>-452.8874055</b> | <b>-458.9955291</b> | <b>-458.9853491</b> |
| $\text{Sn}(\text{H}_2\text{O})_7^{2+} C_{2v} \#1$                       | [6+1]               | [5+2]               | [5+2]               |
| $\text{Sn}(\text{H}_2\text{O})_7^{2+} C_{2v} \#2$                       | [6+1]               | [5+2]               | [5+2]               |
| $\text{Sn}(\text{H}_2\text{O})_7^{2+} C_{2v} \#3$                       | [6+1] -527.8032887  | [6+1]               | [6+1]               |
| $\text{Sn}(\text{H}_2\text{O})_7^{2+} C_{2v} \#4$                       | [5+2]               | [5+2]               | [5+2]               |
| $\text{Sn}(\text{H}_2\text{O})_7^{2+} C_{2v} \#5$                       | [5+2]               | -534.9755149        | -534.9739495        |
| $\text{Sn}(\text{H}_2\text{O})_7^{2+} C_{2v} \#6$                       | [5+2]               | -534.9808923        | -534.9797286        |
| $\text{Sn}(\text{H}_2\text{O})_7^{2+} C_{2v} \#7$                       | [5+2]               | -534.9779544        | -534.9753134        |
| $\text{Sn}(\text{H}_2\text{O})_7^{2+} C_{2v} \#8$                       | [5+2]               | [5+2]               | -534.9881490        |
| $\text{Sn}(\text{H}_2\text{O})_7^{2+} C_{2v} \#9$                       | [5+2]               | [5+2]               | [5+2]               |
| $\text{Sn}(\text{H}_2\text{O})_7^{2+} C_{2v} \#10$                      | [6+1] -527.8000604  | [5+2]               | [5+2]               |
| $\text{Sn}(\text{H}_2\text{O})_7^{2+} C_{2v} \#11$                      | [6+1] -527.8061942  | [4+3] -535.0096029  | [4+3] -535.0025721  |
| $\text{Sn}(\text{H}_2\text{O})_7^{2+} C_{2v} \#12$                      | [6+1] -527.8048504  | [5+2] -535.0159890  | [5+2]               |
| $\text{Sn}(\text{H}_2\text{O})_7^{2+} C_{2v} \#13$                      | [4+3]               | [4+3]               | [5+2]               |
| $\text{Sn}(\text{H}_2\text{O})_7^{2+} C_{2v} \#14$                      | [4+3]               | [4+3]               | [4+3]               |
| $\text{Sn}(\text{H}_2\text{O})_7^{2+} C_{2v} \#15$                      | [4+3]               | [4+3]               | [4+3]               |
| $\text{Sn}(\text{H}_2\text{O})_7^{2+} C_{2v} \#16$                      | [5+2]               | -534.9915126        | -534.9892702        |
| $\text{Sn}(\text{H}_2\text{O})_7^{2+} C_{2v} \#1 [5+2]$                 | -527.8799308        | -535.0300659        | -535.0222504        |
| $\text{Sn}(\text{H}_2\text{O})_7^{2+} C_{2v} \#2 [5+2]$                 | -527.8717812        | -535.0183830        | -535.0115350        |
| $\text{Sn}(\text{H}_2\text{O})_7^{2+} C_{2v} \#3 [5+2]$                 | -527.8779058        | -535.0172752        | -535.0098693        |
| $\text{Sn}(\text{H}_2\text{O})_7^{2+} C_{2v} \#4 [5+2]$                 | -527.8786727        | -535.0191211        | -535.0115904        |
| $\text{Sn}(\text{H}_2\text{O})_7^{2+} C_{2v} \#9 [5+2]$                 | -527.8806916        | -535.0285143        | -535.0203857        |
| $\text{Sn}(\text{H}_2\text{O})_7^{2+} C_{2v} \#10 [5+2]$                | -527.8718080        | -535.0162755        | -535.0090377        |
| $\text{Sn}(\text{H}_2\text{O})_7^{2+} C_{2v} \#11 [5+2]$                |                     |                     |                     |
| $\text{Sn}(\text{H}_2\text{O})_7^{2+} C_{2v} \#12 [5+2]$                | -527.8787610        | -535.0159894        | -535.0080829        |
| $\text{Sn}(\text{H}_2\text{O})_7^{2+} C_2 \#5$                          | n/a                 | [5+2]               | [5+2]               |
| $\text{Sn}(\text{H}_2\text{O})_7^{2+} C_2 \#6$                          | n/a                 | [5+2]               | [5+2]               |
| $\text{Sn}(\text{H}_2\text{O})_7^{2+} C_2 \#7$                          | n/a                 | [4+3]               | [4+3]               |
| $\text{Sn}(\text{H}_2\text{O})_7^{2+} C_2 \#8$                          | n/a                 | n/a                 | [5+2]               |
| $\text{Sn}(\text{H}_2\text{O})_7^{2+} C_2 \#16$                         | n/a                 | [5+2]               | [5+2]               |

|                                                   | HF/LANL2MB (5d) | HF/LANL2DZ (5d) | HF/SDD (6d)        |
|---------------------------------------------------|-----------------|-----------------|--------------------|
| $\text{Sn}(\text{H}_2\text{O})_8^{2+} D_{4h} \#1$ | -602.7629056    | -610.9908991    | -610.9927169       |
| $\text{Sn}(\text{H}_2\text{O})_8^{2+} D_{4h} \#2$ | -602.7630829    | -610.9910799    | -610.9928801       |
| $\text{Sn}(\text{H}_2\text{O})_8^{2+} D_{4d} \#1$ | -602.7758593    | -611.0141986    | -611.0145752       |
| $\text{Sn}(\text{H}_2\text{O})_8^{2+} D_{4d} \#2$ | -602.7752269    | -611.0110672    | -611.0116444       |
| $\text{Sn}(\text{H}_2\text{O})_8^{2+} D_4 \#1$    | $D_4 \#2$       | n/a             | n/a                |
| $\text{Sn}(\text{H}_2\text{O})_8^{2+} D_4 \#2$    | -602.7810916    | -611.0260888    | -611.0261437       |
| $\text{Sn}(\text{H}_2\text{O})_8^{2+} D_4 \#3$    | $D_4 \#2$       | $D_4 \#2$       | $D_4 \#2$          |
| $\text{Sn}(\text{H}_2\text{O})_8^{2+} D_4 \#4$    | $D_4 \#2$       | $D_4 \#2$       | $D_4 \#2$          |
| $\text{Sn}(\text{H}_2\text{O})_8^{2+} C_{4h} \#1$ | -602.7757305    | -611.0236917    | -611.0241601       |
| $\text{Sn}(\text{H}_2\text{O})_8^{2+} C_{4h} \#2$ | $C_{4h} \#1$    | $C_{4h} \#1$    | $C_{4h} \#1$       |
| $\text{Sn}(\text{H}_2\text{O})_8^{2+} C_{4v} \#1$ | -602.8062907    | -611.0178104    | -611.0152471       |
| $\text{Sn}(\text{H}_2\text{O})_8^{2+} C_{4v} \#2$ | [4+4]           | [4+4]           | [4+4]              |
| $\text{Sn}(\text{H}_2\text{O})_8^{2+} C_{4v} \#3$ | [4+4]           | [4+4]           | [4+4]              |
| $\text{Sn}(\text{H}_2\text{O})_8^{2+} C_{4v} \#4$ | -602.7697254    | n/a             | n/a                |
| $\text{Sn}(\text{H}_2\text{O})_8^{2+} S_8 \#1$    | -602.7836074    | -611.0285336    | -611.0282437       |
| $\text{Sn}(\text{H}_2\text{O})_8^{2+} S_8 \#2$    | $S_8 \#1$       | $S_8 \#1$       | $S_8 \#1$          |
| $\text{Sn}(\text{H}_2\text{O})_8^{2+} D_{2d} \#1$ | -602.7709485    | -611.0089524    | -611.0098318       |
| $\text{Sn}(\text{H}_2\text{O})_8^{2+} D_{2d} \#2$ | -602.7724245    | -611.0074649    | -611.0080770       |
| $\text{Sn}(\text{H}_2\text{O})_8^{2+} D_{2d} \#3$ | $D_{2d} \#1$    | $D_{2d} \#1$    | $D_{2d} \#1$       |
| $\text{Sn}(\text{H}_2\text{O})_8^{2+} D_{2d} \#4$ | -602.7753969    | -611.0073923    | -611.0080452       |
| $\text{Sn}(\text{H}_2\text{O})_8^{2+} D_{2d} \#5$ | -602.7798527    | -611.0250322    | -611.0251432       |
| $\text{Sn}(\text{H}_2\text{O})_8^{2+} D_{2h} \#1$ | $D_{4h} \#2$    | $D_{4h} \#2$    | $D_{4h} \#2$       |
| $\text{Sn}(\text{H}_2\text{O})_8^{2+} D_{2h} \#3$ | -602.7734770    | -611.0155752    | -611.0160446       |
| $\text{Sn}(\text{H}_2\text{O})_8^{2+} D_{2h} \#4$ | $D_{2h} \#3$    | $D_{2h} \#3$    | $D_{2h} \#3$       |
| $\text{Sn}(\text{H}_2\text{O})_8^{2+} C_{2v} \#1$ | [4+4]           | [4+4]           | -611.0239684       |
| $\text{Sn}(\text{H}_2\text{O})_8^{2+} C_{2v} \#2$ | [4+4]           | [4+4]           | $C_{2v} \#1$       |
| $\text{Sn}(\text{H}_2\text{O})_8^{2+} C_{2v} \#3$ | [4+4]           | [4+4]           | [4+4]              |
| $\text{Sn}(\text{H}_2\text{O})_8^{2+} C_{2v} \#4$ | [6+2]           | [4+4]           | [4+4]              |
| $\text{Sn}(\text{H}_2\text{O})_8^{2+} C_{2v} \#5$ | [6+2]           | n/a             | n/a                |
| $\text{Sn}(\text{H}_2\text{O})_8^{2+} C_{2v} \#6$ | [6+2]           | [6+2]           | [6+2] -611.0485412 |
| $\text{Sn}(\text{H}_2\text{O})_8^{2+} C_4 \#1$    | [4+4]           | [4+4]           | [4+4]              |
| $\text{Sn}(\text{H}_2\text{O})_8^{2+} C_4 \#2$    | [4+4]           | -611.0287362    | -611.0274035       |
| $\text{Sn}(\text{H}_2\text{O})_8^{2+} C_4 \#3$    | [4+4]           | -611.0287589    | -611.0276042       |
| $\text{Sn}(\text{H}_2\text{O})_8^{2+} S_4 \#1$    | -602.7799271    | n/a             | n/a                |
| $\text{Sn}(\text{H}_2\text{O})_8^{2+} S_4 \#2$    | -602.7805989    | $D_{2d} \#5$    | $D_{2d} \#5$       |
| $\text{Sn}(\text{H}_2\text{O})_8^{2+} S_4 \#3$    | $S_4 \#2$       | $D_{2d} \#5$    | $D_{2d} \#5$       |
| $\text{Sn}(\text{H}_2\text{O})_8^{2+} S_4 \#4$    | $S_4 \#1$       | $D_{2d} \#5$    | $D_{2d} \#5$       |
| $\text{Sn}(\text{H}_2\text{O})_8^{2+} S_4 \#5$    | $S_4 \#1$       | n/a             | n/a                |
| $\text{Sn}(\text{H}_2\text{O})_8^{2+} D_2 \#1$    | -602.7817719    | n/a             | n/a                |
| $\text{Sn}(\text{H}_2\text{O})_8^{2+} D_2 \#2$    | $D_2 \#1$       | $D_4 \#2$       | $D_4 \#2$          |
| $\text{Sn}(\text{H}_2\text{O})_8^{2+} D_2 \#3$    | $D_2 \#1$       | $D_4 \#2$       | $D_4 \#2$          |
| $\text{Sn}(\text{H}_2\text{O})_8^{2+} D_2 \#4$    | $D_4 \#2$       | $D_4 \#2$       | $D_4 \#2$          |
| $\text{Sn}(\text{H}_2\text{O})_8^{2+} D_2 \#5$    | $D_2 \#1$       | $D_4 \#2$       | $D_4 \#2$          |
| $\text{Sn}(\text{H}_2\text{O})_8^{2+} D_2 \#7$    | $D_4 \#2$       | $D_4 \#2$       | $D_4 \#2$          |



|                                                         |                     |                 |                     |
|---------------------------------------------------------|---------------------|-----------------|---------------------|
| $\text{Sn}(\text{H}_2\text{O})_8^{2+} C_{2h} \#2$       | $C_{4h} \#1$        | $C_{4h} \#1$    | $C_{4h} \#1$        |
| $\text{Sn}(\text{H}_2\text{O})_8^{2+} C_2 \#1$          | n/a                 | n/a             | [4+4]               |
| $\text{Sn}(\text{H}_2\text{O})_8^{2+} C_2 \#4$          | n/a                 | [4+2+2]         | [6+2]               |
| $\text{Sn}(\text{H}_2\text{O})_8^{2+} C_2 \#5$          | n/a                 | [4+2+2]         | [6+2]               |
| $\text{Sn}(\text{H}_2\text{O})_8^{2+} C_2 \#6$          | [4+2+2]             | n/a             | n/a                 |
| $\text{Sn}(\text{H}_2\text{O})_8^{2+} C_2 \#8$          | [4+4]               | n/a             | n/a                 |
|                                                         | HF/LANL2MB (5d)     | HF/LANL2DZ (5d) | HF/SDD (6d)         |
| $\text{Sn}(\text{H}_2\text{O})_9^{2+} D_{3h} \#1$       | -677.7659303        | -687.0436706    | -687.0445328        |
| $\text{Sn}(\text{H}_2\text{O})_9^{2+} D_{3h} \#2$       | -677.7567919        | -687.0185417    | -687.0207191        |
| $\text{Sn}(\text{H}_2\text{O})_9^{2+} D_{3h} \#3$       | -677.7557639        | -687.0306811    | -687.0305720        |
| $\text{Sn}(\text{H}_2\text{O})_9^{2+} D_{3h} \#4$       | -677.7669325        | -687.0457065    | -687.0465128        |
| $\text{Sn}(\text{H}_2\text{O})_9^{2+} D_3 \#1$          | -677.7717322        | [6+3]           | -687.0565025        |
| $\text{Sn}(\text{H}_2\text{O})_9^{2+} D_3 \#2$          | $D_3 \#1$           | [6+3]           | $D_3 \#1$           |
| $\text{Sn}(\text{H}_2\text{O})_9^{2+} D_3 \#3$          | $D_3 \#1$           | [6+3]           | [6+3]               |
| $\text{Sn}(\text{H}_2\text{O})_9^{2+} D_3 \#4$          | $D_3 \#1$           | [6+3]           | $D_3 \#1$           |
| $\text{Sn}(\text{H}_2\text{O})_9^{2+} D_3 [6+3]$        | -677.8122748        | -687.0997880    | -687.0982714        |
| $\text{Sn}(\text{H}_2\text{O})_9^{2+} C_{3h} \#1$       | -677.7699489        | -687.0513492    | -687.0522836        |
| $\text{Sn}(\text{H}_2\text{O})_9^{2+} C_{3h} \#2$       | -677.7679599        | -687.0514534    | -687.0523265        |
| $\text{Sn}(\text{H}_2\text{O})_9^{2+} C_{3h} \#3$       | $C_{3h} \#1$        | [6+3]           | [6+3]               |
| $\text{Sn}(\text{H}_2\text{O})_9^{2+} C_{3h} \#4$       | $C_{3h} \#2$        | [6+3]           | [6+3]               |
| $\text{Sn}(\text{H}_2\text{O})_9^{2+} C_{3h} \#3 [6+3]$ |                     | -687.0655164    | -687.0641968        |
| $\text{Sn}(\text{H}_2\text{O})_9^{2+} C_{3h} \#4 [6+3]$ |                     | -687.0964117    | -687.0951859        |
| $\text{Sn}(\text{H}_2\text{O})_9^{2+} C_{3v} \#1$       | [6+3]               | -687.0480445    | -687.0458295        |
| $\text{Sn}(\text{H}_2\text{O})_9^{2+} C_{3v} \#2$       | [6+3]               | [6+3]           | [6+3]               |
| $\text{Sn}(\text{H}_2\text{O})_9^{2+} C_{3v} \#3$       | [6+3]               | [6+3]           | [6+3]               |
| $\text{Sn}(\text{H}_2\text{O})_9^{2+} C_{3v} \#4$       | [6+3]               | -687.0506703    | -687.0478828        |
| $\text{Sn}(\text{H}_2\text{O})_9^{2+} C_{3v} \#1 [6+3]$ | -677.8875289        |                 |                     |
| $\text{Sn}(\text{H}_2\text{O})_9^{2+} C_{3v} \#2 [6+3]$ | -677.8752448        | -687.0914505    | -687.0844896        |
| $\text{Sn}(\text{H}_2\text{O})_9^{2+} C_{3v} \#3 [6+3]$ | -677.8061296        | -687.0822411    | -687.0779010        |
| $\text{Sn}(\text{H}_2\text{O})_9^{2+} C_{3v} \#4 [6+3]$ | -677.8111663        |                 |                     |
| $\text{Sn}(\text{H}_2\text{O})_9^{2+} C_3 \#1$          | [6+3], then [3+3+3] | n/a             | [6+3], then [3+3+3] |
| $\text{Sn}(\text{H}_2\text{O})_9^{2+} C_3 \#2$          | $C_3 \#2 [6+3]$     | $C_3 \#3 [6+3]$ | $C_3 \#3 [6+3]$     |
| $\text{Sn}(\text{H}_2\text{O})_9^{2+} C_3 \#3$          | $C_3 \#3 [6+3]$     | [3+3+3]         | $C_3 \#3 [6+3]$     |
| $\text{Sn}(\text{H}_2\text{O})_9^{2+} C_3 \#4$          | n/a                 | [3+3+3]         | [3+3+3]             |
| $\text{Sn}(\text{H}_2\text{O})_9^{2+} C_3 \#5$          | n/a                 | [3+3+3]         | [3+3+3]             |
| $\text{Sn}(\text{H}_2\text{O})_9^{2+} C_3 \#2 [6+3]$    | <b>-677.8955091</b> | n/a             | n/a                 |
| $\text{Sn}(\text{H}_2\text{O})_9^{2+} C_3 \#3 [6+3]$    | <b>-677.8925007</b> | -687.0923185    | -687.0848568        |
| $\text{Sn}(\text{H}_2\text{O})_{18}^{2+} T [6+12]$      | -1352.7603230       | -1371.4460182   | -1371.4444249       |

|                                                                        | MP2/CEP-31G*                               | MP2/CEP-121G*                              | MP2/gen (5d)<br>M: CEP-121G*<br>OH: 6-31G* | MP2/gen (5d)<br>M: CEP-121G*<br>OH: 6-31+G* |
|------------------------------------------------------------------------|--------------------------------------------|--------------------------------------------|--------------------------------------------|---------------------------------------------|
| $\text{Sn}^{2+} K_h$                                                   | <b>-2.5167184</b>                          | <b>-2.5167184</b>                          | <b>-2.5167184</b>                          | <b>-2.5167184</b>                           |
| $\text{Sn}(\text{H}_2\text{O})_2^{2+} C_{2v}$                          | <b>-19.6540746</b>                         | <b>-19.6698782</b>                         | <b>-78.8235443</b>                         | <b>-78.8292647</b>                          |
| $\text{Sn}(\text{H}_2\text{O})_2^{2+} D_{2d}$                          | -36.7558913                                | -36.7872336                                | -155.0888630                               | -155.1031358                                |
| $\text{Sn}(\text{H}_2\text{O})_2^{2+} C_s$                             | -36.7742112                                | -36.8061781                                | -155.1111468                               | -155.1231046                                |
| $\text{Sn}(\text{H}_2\text{O})_2^{2+} C_2$                             | <b>-36.7744271</b>                         | <b>-36.8063047</b>                         | <b>-155.1112802</b>                        | <b>-155.1232946</b>                         |
| $\text{Sn}(\text{H}_2\text{O})_2^{2+} + \text{H}_2\text{O} C_s$        | $\text{SnOH}^+ + \text{H}_3\text{O}^+ C_s$ | $\text{SnOH}^+ + \text{H}_3\text{O}^+ C_s$ | $\text{SnOH}^+ + \text{H}_3\text{O}^+ C_s$ | $\text{SnOH}^+ + \text{H}_3\text{O}^+ C_s$  |
| $\text{SnOH}^+ + \text{H}_3\text{O}^+ C_s$                             | <b>-36.7648087</b>                         | <b>-36.7962511</b>                         | <b>-155.1005517</b>                        | <b>-155.1161746</b>                         |
| $\text{Sn}(\text{H}_2\text{O})_3^{2+} D_{3h} \#1$                      | -53.8550190                                | -53.9023358                                | -231.3541460                               | -231.3757110                                |
| $\text{Sn}(\text{H}_2\text{O})_3^{2+} D_{3h} \#2$                      | -53.8551131                                | -53.9020189                                | -231.3533533                               | -231.3756406                                |
| $\text{Sn}(\text{H}_2\text{O})_3^{2+} D_3$                             | -53.8561844                                | -53.9033956                                | -231.3549609                               | -231.3769215                                |
| $\text{Sn}(\text{H}_2\text{O})_3^{2+} C_{3v} \#1$                      | -53.8759476                                | -53.9236103                                | -231.3791796                               | -231.3991269                                |
| $\text{Sn}(\text{H}_2\text{O})_3^{2+} C_{3v} \#2$                      | -53.8730658                                | -53.9208078                                | -231.3761524                               | -231.3960019                                |
| $\text{Sn}(\text{H}_2\text{O})_3^{2+} C_3$                             | <b>-53.8819903</b>                         | <b>-53.9303315</b>                         | <b>-231.3853827</b>                        | <b>-231.4050646</b>                         |
| $\text{Sn}(\text{H}_2\text{O})_2^{2+} + \text{H}_2\text{O} C_{2v}$     | <b>-53.8708551</b>                         | <b>-53.9176792</b>                         | <b>-231.3747520</b>                        | <b>-231.3941638</b>                         |
| $\text{Sn}(\text{H}_2\text{O})_4^{2+} D_{2d} \#1$                      | -70.9442561                                | -71.0070795                                | -307.6075985                               | -307.6398960                                |
| $\text{Sn}(\text{H}_2\text{O})_4^{2+} D_{2d} \#2$                      | -70.9440391                                | -71.0068474                                | -307.6074914                               | -307.6397588                                |
| $\text{Sn}(\text{H}_2\text{O})_4^{2+} D_2$                             | -70.9443738                                | -71.0072629                                | $D_{2d} \#1$                               | -307.6399012                                |
| $\text{Sn}(\text{H}_2\text{O})_4^{2+} S_4$                             | -70.9450923                                | -71.0081099                                | -307.6083927                               | -307.6409923                                |
| $\text{Sn}(\text{H}_2\text{O})_4^{2+} C_{2v} \#1$                      | -70.9600414                                | -71.0236551                                | -307.6273204                               | -307.6564798                                |
| $\text{Sn}(\text{H}_2\text{O})_4^{2+} C_{2v} \#2$                      | -70.9581895                                | -71.0216036                                | -307.6244786                               | -307.6547945                                |
| $\text{Sn}(\text{H}_2\text{O})_4^{2+} C_{2v} \#3$                      | -70.9657754                                | -71.0296173                                | -307.6331990                               | -307.6625141                                |
| $\text{Sn}(\text{H}_2\text{O})_4^{2+} C_2$                             | <b>-70.9660317</b>                         | <b>-71.0301991</b>                         | <b>-307.6337727</b>                        | <b>-307.6629445</b>                         |
| $\text{Sn}(\text{H}_2\text{O})_3^{2+} + \text{H}_2\text{O} C_s \#1$    | <b>-70.9676161</b>                         | <b>-71.0312429</b>                         | -307.6373867                               | <b>-307.6651269</b>                         |
| $\text{Sn}(\text{H}_2\text{O})_3^{2+} + \text{H}_2\text{O} C_s \#2$    | <b>-70.9683594</b>                         | <b>-71.0316288</b>                         | <b>-307.6379641</b>                        | <b>-307.6657735</b>                         |
| $\text{Sn}(\text{H}_2\text{O})_5^{2+} C_{2v} \#1$                      | -88.0448420                                | -88.1248411                                | -383.8745675                               | -383.9157711                                |
| $\text{Sn}(\text{H}_2\text{O})_5^{2+} C_{2v} \#2$                      | -88.0332257                                | -88.1126254                                | -383.8628047                               | -383.9039197                                |
| $\text{Sn}(\text{H}_2\text{O})_5^{2+} C_{2v} \#3$                      | -88.0325006                                | 88.1112474                                 | -383.8624118                               | -383.9032234                                |
| $\text{Sn}(\text{H}_2\text{O})_5^{2+} C_{2v} \#4$                      | -88.0315241                                | -88.1104893                                | -383.8604384                               | -383.9025321                                |
| $\text{Sn}(\text{H}_2\text{O})_5^{2+} C_2$                             | n/a                                        | n/a                                        | -383.8746235                               | n/a                                         |
| $\text{Sn}(\text{H}_2\text{O})_5^{2+} C_s \#1$                         | <b>-88.0449020</b>                         | <b>-88.1249398</b>                         | <b>-383.8753704</b>                        | <b>-383.9159029</b>                         |
| $\text{Sn}(\text{H}_2\text{O})_5^{2+} C_s \#2$                         | n/a                                        | n/a                                        | -383.8745677                               | n/a                                         |
| $\text{Sn}(\text{H}_2\text{O})_4^{2+} + \text{H}_2\text{O} C_{2v} \#1$ | -88.0442260                                | -88.1230951                                | -383.8765091                               | -383.9155685                                |
| $\text{Sn}(\text{H}_2\text{O})_4^{2+} + \text{H}_2\text{O} C_{2v} \#2$ | -88.0437062                                | -88.1230097                                | -383.8766242                               | -383.9150198                                |
| $\text{Sn}(\text{H}_2\text{O})_4^{2+} + \text{H}_2\text{O} C_2 \#1$    | -88.0452154                                | -88.1248338                                | -383.8786596                               | -383.9169395                                |
| $\text{Sn}(\text{H}_2\text{O})_4^{2+} + \text{H}_2\text{O} C_s \#1$    | -88.0444629                                | -88.1233260                                | -383.8767711                               | -383.9157711                                |
| $\text{Sn}(\text{H}_2\text{O})_4^{2+} + \text{H}_2\text{O} C_s \#2$    | -88.0464965                                | -88.1260150                                | -383.8794501                               | -383.9179260                                |
| $\text{Sn}(\text{H}_2\text{O})_4^{2+} + \text{H}_2\text{O} C_l \#2$    | <b>-88.0464992</b>                         | <b>-88.1261893</b>                         | <b>-383.8800403</b>                        | <b>-383.9180171</b>                         |
| $\text{Sn}(\text{H}_2\text{O})_5^{2+} C_s [4+1]$                       | <b>-88.0464646</b>                         | <b>-88.1257151</b>                         | <b>-383.8778419</b>                        | <b>-383.9170463</b>                         |
| $\text{Sn}(\text{H}_2\text{O})_3^{2+} + 2\text{H}_2\text{O} C_s \#1$   | <b>-88.0463078</b>                         | <b>-88.1254686</b>                         | <b>-383.8826452</b>                        | <b>-383.9185739</b>                         |

|                                                                         | MP2/CEP-31G*        | MP2/CEP-121G*       | MP2/gen (5d)<br>M: CEP-121G*<br>OH: 6-31G* | MP2/gen (5d)<br>M: CEP-121G*<br>OH: 6-31+G* |
|-------------------------------------------------------------------------|---------------------|---------------------|--------------------------------------------|---------------------------------------------|
| $\text{Sn}(\text{H}_2\text{O})_6^{2+} T_h$                              | -105.0998234        | -105.1950030        | -460.0872358                               | -460.1464384                                |
| $\text{Sn}(\text{H}_2\text{O})_6^{2+} S_6$                              | n/a                 | n/a                 | -460.0885222                               | n/a                                         |
| $\text{Sn}(\text{H}_2\text{O})_6^{2+} C_3$                              | <b>-105.1128911</b> | -105.2090915        | [3+3]                                      | -460.1584960                                |
| $\text{Sn}(\text{H}_2\text{O})_5^{2+} + \text{H}_2\text{O} C_s \#1$     | -105.1145549        | -105.2089004        | -460.1101352                               | -460.1599624                                |
| $\text{Sn}(\text{H}_2\text{O})_5^{2+} + \text{H}_2\text{O} C_s \#2$     | <b>-105.1220925</b> | <b>-105.2171871</b> | <b>-460.1182637</b>                        | <b>-460.1676422</b>                         |
| $\text{Sn}(\text{H}_2\text{O})_4^{2+} + 2\text{H}_2\text{O} C_{2v} \#1$ | -105.1209405        | -105.2148016        | -460.1196755                               | -460.1658292                                |
| $\text{Sn}(\text{H}_2\text{O})_4^{2+} + 2\text{H}_2\text{O} C_2 \#1$    | <b>-105.1300427</b> | <b>-105.2248808</b> | <b>-460.1290800</b>                        | <b>-460.1755889</b>                         |
| $\text{Sn}(\text{H}_2\text{O})_4^{2+} + 2\text{H}_2\text{O} C_s \#1$    | -105.1208933        | -105.2157921        | -460.1201502                               | -460.1664532                                |
| $\text{Sn}(\text{H}_2\text{O})_4^{2+} + 2\text{H}_2\text{O} C_s \#2$    | <b>-105.1254209</b> | <b>-105.2204533</b> | <b>-460.1247914</b>                        | <b>-460.1710329</b>                         |
| $\text{Sn}(\text{H}_2\text{O})_3^{2+} + 3\text{H}_2\text{O} C_{3v} \#1$ | <b>-105.1158160</b> | <b>-105.2122038</b> | <b>-460.1191138</b>                        | <b>-460.1636853</b>                         |
| $\text{Sn}(\text{H}_2\text{O})_6^{2+} C_3 [3+3]$                        | <b>-105.1200335</b> | <b>-105.2135731</b> | <b>-460.1164441</b>                        | <b>-460.1645166</b>                         |
| $\text{Sn}(\text{H}_2\text{O})_7^{2+} C_{2v} \#1$                       | [5+2]               | [5+2]               | [5+2]                                      | [5+2]                                       |
| $\text{Sn}(\text{H}_2\text{O})_7^{2+} C_{2v} \#2$                       | [5+2]               | [5+2]               | [5+2]                                      | [5+2]                                       |
| $\text{Sn}(\text{H}_2\text{O})_7^{2+} C_{2v} \#3$                       | [6+1]               | [6+1]               | [6+1]                                      | [6+1]                                       |
| $\text{Sn}(\text{H}_2\text{O})_7^{2+} C_{2v} \#4$                       | [5+2]               | [5+2]               | [5+2]                                      | [5+2]                                       |
| $\text{Sn}(\text{H}_2\text{O})_7^{2+} C_{2v} \#5$                       | -122.1466977        | -122.2576220        | -536.3019035                               | -536.3670074                                |
| $\text{Sn}(\text{H}_2\text{O})_7^{2+} C_{2v} \#6$                       | -122.1541133        | -122.2648606        | -536.3067786                               | -536.3744048                                |
| $\text{Sn}(\text{H}_2\text{O})_7^{2+} C_{2v} \#7$                       | -122.1503047        | -122.2620385        | -536.3071092                               | -536.3709942                                |
| $\text{Sn}(\text{H}_2\text{O})_7^{2+} C_{2v} \#8$                       | -122.1621089        | -122.2738236        | -536.3174359                               | -536.3824650                                |
| $\text{Sn}(\text{H}_2\text{O})_7^{2+} C_{2v} \#9$                       | -122.1610826        | -122.2722681        | [5+2]                                      | [6+1]                                       |
| $\text{Sn}(\text{H}_2\text{O})_7^{2+} C_{2v} \#10$                      | -122.1492798        | -122.2589951        | [5+2]                                      | [5+2]                                       |
| $\text{Sn}(\text{H}_2\text{O})_7^{2+} C_{2v} \#11$                      | [4+3]               | [4+3]               | [4+3]                                      | [4+3]                                       |
|                                                                         | -122.1622854        | -122.2717312        | -536.3173541                               | -536.3814919                                |
| $\text{Sn}(\text{H}_2\text{O})_7^{2+} C_{2v} \#12$                      | -122.1493804        | [5+2]               | -536.3020924                               | [5+2]                                       |
| $\text{Sn}(\text{H}_2\text{O})_7^{2+} C_{2v} \#13$                      | -122.1605101        | [4+3]               | [5+2]                                      | [5+2]                                       |
| $\text{Sn}(\text{H}_2\text{O})_7^{2+} C_{2v} \#14$                      | [4+3]               | [5+2]               | [5+2]                                      | [4+3]                                       |
| $\text{Sn}(\text{H}_2\text{O})_7^{2+} C_{2v} \#15$                      | -122.1634274        | -122.2749151        | [5+2]                                      | -536.3842153                                |
|                                                                         |                     |                     | -536.3216623                               | [5+2]                                       |
|                                                                         |                     |                     |                                            | -536.3858208                                |
| $\text{Sn}(\text{H}_2\text{O})_7^{2+} C_{2v} \#16$                      | -122.1637137        | -122.2750229        | -536.3159358                               | -536.3858338                                |
| $\text{Sn}(\text{H}_2\text{O})_7^{2+} C_{2v} \#1 [5+2]$                 | -122.1832342        | -122.2940842        | -536.3401952                               | -536.4025476                                |
| $\text{Sn}(\text{H}_2\text{O})_7^{2+} C_{2v} \#2 [5+2]$                 | -122.1711558        | -122.2812292        | -536.3278935                               | -536.3908497                                |
| $\text{Sn}(\text{H}_2\text{O})_7^{2+} C_{2v} \#3 [5+2]$                 | -122.1691414        | -122.2787901        | -536.3265558                               | -536.3884279                                |
| $\text{Sn}(\text{H}_2\text{O})_7^{2+} C_{2v} \#4 [5+2]$                 | -122.1708561        | -122.2806541        | -536.3286509                               | -536.3902309                                |
| $\text{Sn}(\text{H}_2\text{O})_7^{2+} C_{2v} \#9 [5+2]$                 | -122.1807966        | -122.2912013        | -536.3376788                               | -536.4001543                                |
| $\text{Sn}(\text{H}_2\text{O})_7^{2+} C_{2v} \#10 [5+2]$                | -122.1677760        | -122.2771905        | -536.3242955                               | -536.3872004                                |
| $\text{Sn}(\text{H}_2\text{O})_7^{2+} C_{2v} \#11 [5+2]$                |                     |                     |                                            |                                             |
| $\text{Sn}(\text{H}_2\text{O})_7^{2+} C_{2v} \#12 [5+2]$                | -122.1662762        | -122.2754472        | -536.3238739                               | -536.3853546                                |
| $\text{Sn}(\text{H}_2\text{O})_7^{2+} C_2 \#5$                          | [5+2]               | [5+2]               | [5+2]                                      | [5+2]                                       |
| $\text{Sn}(\text{H}_2\text{O})_7^{2+} C_2 \#6$                          | [5+2]               | [5+2]               | [5+2]                                      | [5+2]                                       |
| $\text{Sn}(\text{H}_2\text{O})_7^{2+} C_2 \#7$                          | [4+3]               | [4+3]               | [4+3]                                      | [4+3]                                       |
| $\text{Sn}(\text{H}_2\text{O})_7^{2+} C_2 \#8$                          | [5+2]               | [5+2]               | [5+2]                                      | [5+2]                                       |

|                                                 |       |       |       |       |
|-------------------------------------------------|-------|-------|-------|-------|
| $\text{Sn}(\text{H}_2\text{O})_7^{2+} C_2 \#9$  | [5+2] | [5+2] | n/a   | n/a   |
| $\text{Sn}(\text{H}_2\text{O})_7^{2+} C_2 \#10$ | [6+1] | [6+1] | n/a   | n/a   |
| $\text{Sn}(\text{H}_2\text{O})_7^{2+} C_2 \#12$ | [5+2] | n/a   | [6+1] | n/a   |
| $\text{Sn}(\text{H}_2\text{O})_7^{2+} C_2 \#13$ | [4+3] | n/a   | n/a   | n/a   |
| $\text{Sn}(\text{H}_2\text{O})_7^{2+} C_2 \#15$ | [4+3] | [4+3] | n/a   | [4+3] |
| $\text{Sn}(\text{H}_2\text{O})_7^{2+} C_2 \#16$ | [5+2] | [5+2] | [5+2] | [4+3] |

|                                                                           | MP2/CEP-31G*                             | MP2/CEP-121G*                            | MP2/gen (5d)<br>M: CEP-121G*<br>OH: 6-31G* | MP2/gen (5d)<br>M: CEP-121G*<br>OH: 6-31+G* |
|---------------------------------------------------------------------------|------------------------------------------|------------------------------------------|--------------------------------------------|---------------------------------------------|
| Sn(H <sub>2</sub> O) <sub>8</sub> <sup>2+</sup> <i>D</i> <sub>4h</sub> #1 | -139.1899651                             | -139.3151683                             | -612.5068117                               | -612.5850668                                |
| Sn(H <sub>2</sub> O) <sub>8</sub> <sup>2+</sup> <i>D</i> <sub>4h</sub> #2 | -139.1903160                             | -139.3157341                             | -612.5074275                               | -612.5853035                                |
| Sn(H <sub>2</sub> O) <sub>8</sub> <sup>2+</sup> <i>D</i> <sub>4d</sub> #1 | -139.2124287                             | -139.3396504                             | -612.5279764                               | -612.6078220                                |
| Sn(H <sub>2</sub> O) <sub>8</sub> <sup>2+</sup> <i>D</i> <sub>4d</sub> #2 | -139.2116219                             | -139.3375183                             | -612.5251916                               | -612.6069587                                |
| Sn(H <sub>2</sub> O) <sub>8</sub> <sup>2+</sup> <i>D</i> <sub>4</sub> #1  | -139.2124288*                            | -139.3396941                             | -612.5284151                               | -612.6078463                                |
| Sn(H <sub>2</sub> O) <sub>8</sub> <sup>2+</sup> <i>D</i> <sub>4</sub> #2  | -139.2270820                             | -139.3554088                             | -612.5459720                               | -612.6241169                                |
| Sn(H <sub>2</sub> O) <sub>8</sub> <sup>2+</sup> <i>D</i> <sub>4</sub> #3  | <i>D</i> <sub>4</sub> #2                 | <i>D</i> <sub>4</sub> #2                 | <i>D</i> <sub>4</sub> #2                   | <i>D</i> <sub>4</sub> #2                    |
| Sn(H <sub>2</sub> O) <sub>8</sub> <sup>2+</sup> <i>D</i> <sub>4</sub> #4  | <i>D</i> <sub>4</sub> #2                 | <i>D</i> <sub>4</sub> #2                 | <i>D</i> <sub>4</sub> #2                   | <i>D</i> <sub>4</sub> #2                    |
| Sn(H <sub>2</sub> O) <sub>8</sub> <sup>2+</sup> <i>C</i> <sub>4h</sub> #1 | -139.2247492                             | -139.3533155                             | -612.5438270                               | -612.6217057                                |
| Sn(H <sub>2</sub> O) <sub>8</sub> <sup>2+</sup> <i>C</i> <sub>4h</sub> #2 | <i>C</i> <sub>4h</sub> #1                | <i>C</i> <sub>4h</sub> #1                | <i>C</i> <sub>4h</sub> #1                  | <i>C</i> <sub>4h</sub> #1                   |
| Sn(H <sub>2</sub> O) <sub>8</sub> <sup>2+</sup> <i>C</i> <sub>4v</sub> #1 | n/a                                      | n/a                                      | -612.5283028                               | n/a                                         |
| Sn(H <sub>2</sub> O) <sub>8</sub> <sup>2+</sup> <i>C</i> <sub>4v</sub> #2 | n/a                                      | -139.3378893                             | [4+4]                                      | n/a                                         |
| Sn(H <sub>2</sub> O) <sub>8</sub> <sup>2+</sup> <i>S</i> <sub>8</sub> #1  | -139.2283462                             | -139.3568124                             | -612.5452691                               | -612.6250077                                |
| Sn(H <sub>2</sub> O) <sub>8</sub> <sup>2+</sup> <i>S</i> <sub>8</sub> #2  | <i>S</i> <sub>8</sub> #1<br>-139.2278620 | <i>S</i> <sub>8</sub> #1<br>-139.3561942 | <i>S</i> <sub>8</sub> #1<br>-612.5460669   | <i>S</i> <sub>8</sub> #1<br>-612.6250219    |
| Sn(H <sub>2</sub> O) <sub>8</sub> <sup>2+</sup> <i>D</i> <sub>2d</sub> #1 | -139.2103157                             | -139.3372680                             | -612.5269562                               | -612.6058790                                |
| Sn(H <sub>2</sub> O) <sub>8</sub> <sup>2+</sup> <i>D</i> <sub>2d</sub> #2 | -139.2069033                             | -139.3323566                             | -612.5218283                               | -612.6026542                                |
| Sn(H <sub>2</sub> O) <sub>8</sub> <sup>2+</sup> <i>D</i> <sub>2d</sub> #3 | <i>D</i> <sub>2d</sub> #1                | <i>D</i> <sub>2d</sub> #1                | <i>D</i> <sub>2d</sub> #1                  | <i>D</i> <sub>2d</sub> #1                   |
| Sn(H <sub>2</sub> O) <sub>8</sub> <sup>2+</sup> <i>D</i> <sub>2d</sub> #4 | -139.2077505                             | -139.3346638                             | -612.5259344                               | -612.6036306                                |
| Sn(H <sub>2</sub> O) <sub>8</sub> <sup>2+</sup> <i>D</i> <sub>2d</sub> #5 | -139.2245461                             | -139.3521339                             | -612.5409272                               | -612.6218308                                |
| Sn(H <sub>2</sub> O) <sub>8</sub> <sup>2+</sup> <i>D</i> <sub>2h</sub> #1 | <i>D</i> <sub>4h</sub> #2                | <i>D</i> <sub>4h</sub> #2                | <i>D</i> <sub>4h</sub> #2                  | <i>D</i> <sub>4h</sub> #2                   |
| Sn(H <sub>2</sub> O) <sub>8</sub> <sup>2+</sup> <i>D</i> <sub>2h</sub> #2 | -139.1910699                             | -139.3178215                             | -612.5098950                               | -612.5868288                                |
| Sn(H <sub>2</sub> O) <sub>8</sub> <sup>2+</sup> <i>D</i> <sub>2h</sub> #3 | -139.2160513                             | -139.3432206                             | -612.5319117                               | -612.6124419                                |
| Sn(H <sub>2</sub> O) <sub>8</sub> <sup>2+</sup> <i>D</i> <sub>2h</sub> #4 | <i>D</i> <sub>2h</sub> #3                | <i>D</i> <sub>2h</sub> #3                | <i>D</i> <sub>2h</sub> #3                  | <i>D</i> <sub>2h</sub> #3                   |
| Sn(H <sub>2</sub> O) <sub>8</sub> <sup>2+</sup> <i>C</i> <sub>2v</sub> #1 | -139.2197112                             | -139.3469296                             | -612.5366690                               | -612.6160677                                |
| Sn(H <sub>2</sub> O) <sub>8</sub> <sup>2+</sup> <i>C</i> <sub>2v</sub> #2 | -139.2196464                             | -139.3465075                             | <i>C</i> <sub>2v</sub> #1                  | <i>C</i> <sub>2v</sub> #1                   |
| Sn(H <sub>2</sub> O) <sub>8</sub> <sup>2+</sup> <i>C</i> <sub>2v</sub> #3 | [4+4]                                    | [4+4]                                    | [4+4]                                      | [4+4]                                       |
| Sn(H <sub>2</sub> O) <sub>8</sub> <sup>2+</sup> <i>C</i> <sub>2v</sub> #6 | [6+2]                                    | [6+2]                                    | [6+2]                                      | [6+2]                                       |
| Sn(H <sub>2</sub> O) <sub>8</sub> <sup>2+</sup> <i>C</i> <sub>4</sub> #1  | [4+4]                                    | [4+4]                                    | [4+4]                                      | [4+4]                                       |
| Sn(H <sub>2</sub> O) <sub>8</sub> <sup>2+</sup> <i>C</i> <sub>4</sub> #2  | n/a                                      | n/a                                      | -612.5460811                               | n/a                                         |
| Sn(H <sub>2</sub> O) <sub>8</sub> <sup>2+</sup> <i>C</i> <sub>4</sub> #3  | <i>S</i> <sub>8</sub> #2                 | <i>S</i> <sub>8</sub> #2                 | -612.5461289                               | -612.6250219                                |
| Sn(H <sub>2</sub> O) <sub>8</sub> <sup>2+</sup> <i>S</i> <sub>4</sub> #2  | -139.2244835                             | -139.3526430                             | -612.5433776                               | 612.6218317                                 |
| Sn(H <sub>2</sub> O) <sub>8</sub> <sup>2+</sup> <i>S</i> <sub>4</sub> #3  | <i>S</i> <sub>4</sub> #5                 | <i>S</i> <sub>4</sub> #2                 | <i>S</i> <sub>4</sub> #2                   | <i>S</i> <sub>4</sub> #2                    |
| Sn(H <sub>2</sub> O) <sub>8</sub> <sup>2+</sup> <i>S</i> <sub>4</sub> #4  | <i>S</i> <sub>4</sub> #2                 | -139.3526812                             | -612.5435486                               | <i>S</i> <sub>4</sub> #2                    |
| Sn(H <sub>2</sub> O) <sub>8</sub> <sup>2+</sup> <i>S</i> <sub>4</sub> #5  | -139.2246084                             | <i>S</i> <sub>4</sub> #2                 | <i>S</i> <sub>4</sub> #2                   | <i>S</i> <sub>4</sub> #2                    |
| Sn(H <sub>2</sub> O) <sub>8</sub> <sup>2+</sup> <i>D</i> <sub>2</sub> #2  | <i>D</i> <sub>4</sub> #2                 | <i>D</i> <sub>4</sub> #2                 | <i>D</i> <sub>4</sub> #2                   | <i>D</i> <sub>4</sub> #2                    |
| Sn(H <sub>2</sub> O) <sub>8</sub> <sup>2+</sup> <i>D</i> <sub>2</sub> #3  | <i>D</i> <sub>4</sub> #2                 | <i>D</i> <sub>4</sub> #2                 | <i>D</i> <sub>4</sub> #2                   | <i>D</i> <sub>4</sub> #2                    |
| Sn(H <sub>2</sub> O) <sub>8</sub> <sup>2+</sup> <i>D</i> <sub>2</sub> #4  | <i>D</i> <sub>4</sub> #2                 | <i>D</i> <sub>4</sub> #2                 | <i>D</i> <sub>4</sub> #2                   | <i>D</i> <sub>4</sub> #2                    |
| Sn(H <sub>2</sub> O) <sub>8</sub> <sup>2+</sup> <i>D</i> <sub>2</sub> #5  | <i>D</i> <sub>4</sub> #2                 | -139.3554087                             | <i>D</i> <sub>4</sub> #2                   | <i>D</i> <sub>4</sub> #2                    |
| Sn(H <sub>2</sub> O) <sub>8</sub> <sup>2+</sup> <i>D</i> <sub>2</sub> #6  | <i>D</i> <sub>4</sub> #2                 | <i>D</i> <sub>2</sub> #5                 | <i>D</i> <sub>4</sub> #2                   | <i>D</i> <sub>4</sub> #2                    |
| Sn(H <sub>2</sub> O) <sub>8</sub> <sup>2+</sup> <i>D</i> <sub>2</sub> #7  | <i>D</i> <sub>4</sub> #2                 | <i>D</i> <sub>2</sub> #5                 | <i>D</i> <sub>4</sub> #2                   | <i>D</i> <sub>4</sub> #2                    |
| Sn(H <sub>2</sub> O) <sub>8</sub> <sup>2+</sup> <i>C</i> <sub>2h</sub> #1 | <i>C</i> <sub>4h</sub> #1                | <i>C</i> <sub>4h</sub> #1                | <i>C</i> <sub>4h</sub> #1                  | <i>C</i> <sub>4h</sub> #1                   |

|                                                         |                     |                     |                                            |                                             |
|---------------------------------------------------------|---------------------|---------------------|--------------------------------------------|---------------------------------------------|
| $\text{Sn}(\text{H}_2\text{O})_8^{2+} C_{2h} \#2$       | $C_{4h} \#1$        | $C_{4h} \#1$        | $C_{4h} \#1$                               | $C_{4h} \#1$                                |
| $\text{Sn}(\text{H}_2\text{O})_8^{2+} C_2 \#1$          | [4+4]               | [4+4]               | [4+2+2]                                    | [4+2+2]                                     |
| $\text{Sn}(\text{H}_2\text{O})_8^{2+} C_2 \#2$          | [4+4]               | [4+4]               | n/a                                        | n/a                                         |
| $\text{Sn}(\text{H}_2\text{O})_8^{2+} C_2 \#6$          | [4+4]               | [6+2]               | [4+2+2]                                    | [6+2]                                       |
| $\text{Sn}(\text{H}_2\text{O})_8^{2+} C_2 \#7$          | n/a                 | n/a                 | [4+2+2]                                    | n/a                                         |
| $\text{Sn}(\text{H}_2\text{O})_8^{2+} C_2 \#10$         | n/a                 | [6+2]               | n/a                                        | n/a                                         |
|                                                         | MP2/CEP-31G*        | MP2/CEP-121G*       | MP2/gen (5d)<br>M: CEP-121G*<br>OH: 6-31G* | MP2/gen (5d)<br>M: CEP-121G*<br>OH: 6-31+G* |
| $\text{Sn}(\text{H}_2\text{O})_9^{2+} D_{3h} \#1$       | -156.2662794        | 156.4091563         | -688.7445207                               | -688.8391740                                |
| $\text{Sn}(\text{H}_2\text{O})_9^{2+} D_{3h} \#2$       | 156.2410392         | -156.3830509        | -688.7207277                               | -688.8121788                                |
| $\text{Sn}(\text{H}_2\text{O})_9^{2+} D_{3h} \#3$       | -156.2505175        | -156.3933783        | -688.7306496                               | -688.8235196                                |
| $\text{Sn}(\text{H}_2\text{O})_9^{2+} D_{3h} \#4$       | -156.2712296        | -156.4140620        | -688.7492059                               | -688.8432813                                |
| $\text{Sn}(\text{H}_2\text{O})_9^{2+} D_3 \#1$          | -156.2801652        | -156.4239790        | -688.7592218                               | -688.8533523                                |
| $\text{Sn}(\text{H}_2\text{O})_9^{2+} D_3 \#2$          | $D_3 \#1$           | -156.4238043        | $D_3 \#1$                                  | $D_3 \#1$                                   |
| $\text{Sn}(\text{H}_2\text{O})_9^{2+} D_3 \#3$          | [6+3]               | [6+3]               | [6+3]                                      | [6+3]                                       |
| $\text{Sn}(\text{H}_2\text{O})_9^{2+} D_3 \#4$          | $D_3 \#1$           | $D_3 \#1$           | [6+3]                                      | $D_3 \#1$                                   |
| $\text{Sn}(\text{H}_2\text{O})_9^{2+} D_3 [6+3]$        | -156.3114007        | -156.4531152        | -688.7947135                               | -688.8819366                                |
| $\text{Sn}(\text{H}_2\text{O})_9^{2+} C_{3h} \#1$       | -156.2792308        | -156.4230212        | -688.7597329                               | -688.8512464                                |
| $\text{Sn}(\text{H}_2\text{O})_9^{2+} C_{3h} \#2$       | -156.2765182        | -156.4206692        | -688.7577908                               | -688.8495496                                |
| $\text{Sn}(\text{H}_2\text{O})_9^{2+} C_{3h} \#3$       | $C_{3h} \#1$        | $C_{3h} \#1$        | $C_{3h} \#1$                               | $C_{3h} \#1$                                |
| $\text{Sn}(\text{H}_2\text{O})_9^{2+} C_{3h} \#4$       | -156.2743044        | -156.4179850        | -688.7527138                               | -688.8477433                                |
| $\text{Sn}(\text{H}_2\text{O})_9^{2+} C_{3v} \#1$       | $D_{3h} \#1$        | $D_{3h} \#1$        | -688.7447753                               | $D_{3h} \#1$                                |
| $\text{Sn}(\text{H}_2\text{O})_9^{2+} C_{3v} \#2$       | [6+3]               | [6+3]               | [6+3]                                      | [6+3]                                       |
| $\text{Sn}(\text{H}_2\text{O})_9^{2+} C_{3v} \#3$       | [6+3]               | [6+3]               | [6+3]                                      | [6+3]                                       |
| $\text{Sn}(\text{H}_2\text{O})_9^{2+} C_{3v} \#4$       | -156.2712922        | -156.4142206        | -688.7502038                               | -688.8432914                                |
| $\text{Sn}(\text{H}_2\text{O})_9^{2+} C_{3v} \#2 [6+3]$ | -156.2838724        | -156.4254644        | -688.7686107                               | -688.8538609                                |
| $\text{Sn}(\text{H}_2\text{O})_9^{2+} C_{3v} \#3 [6+3]$ | -156.2894899        | -156.4329061        | -688.7687221                               | -688.8537569                                |
| $\text{Sn}(\text{H}_2\text{O})_9^{2+} C_3 \#1$          | $C_3 \#1 [6+3]$     | $C_3 \#1 [6+3]$     | $C_3 \#1 [6+3]$                            | $C_3 \#1 [6+3]$                             |
| $\text{Sn}(\text{H}_2\text{O})_9^{2+} C_3 \#2$          | $C_3 \#3 [6+3]$     | $C_3 \#3 [6+3]$     | $C_3 \#3 [6+3]$                            | $C_3 \#3 [6+3]$                             |
| $\text{Sn}(\text{H}_2\text{O})_9^{2+} C_3 \#3$          | $C_3 \#3 [6+3]$     | $C_3 \#3 [6+3]$     | $C_3 \#3 [6+3]$                            | $C_3 \#3 [6+3]$                             |
| $\text{Sn}(\text{H}_2\text{O})_9^{2+} C_3 \#4$          | $C_3 \#1 [6+3]$     | $C_3 \#1 [6+3]$     | $C_3 \#1 [6+3]$                            | $C_3 \#1 [6+3]$                             |
| $\text{Sn}(\text{H}_2\text{O})_9^{2+} C_3 \#5$          | $C_3 \#1 [6+3]$     | $C_3 \#1 [6+3]$     | $C_3 \#1 [6+3]$                            | $C_3 \#1 [6+3]$                             |
| $\text{Sn}(\text{H}_2\text{O})_9^{2+} C_3 \#1 [6+3]$    | -156.3038864        | -156.4470389        | <b>-688.7899471</b>                        | -688.8734770                                |
| $\text{Sn}(\text{H}_2\text{O})_9^{2+} C_3 \#3 [6+3]$    | <b>-156.2989000</b> | <b>-156.4432958</b> | <b>-688.7894818</b>                        | <b>-688.8708052</b>                         |

|                                                                        | HF/gen (5d)<br>M: CEP-121G*<br>OH: 6-31G*  | HF/gen (5d)<br>M: LANL2DZ<br>OH: 6-31G*    | HF/gen (5d)<br>M: SDD<br>OH: 6-31G*        |
|------------------------------------------------------------------------|--------------------------------------------|--------------------------------------------|--------------------------------------------|
| $\text{Sn}^{2+} K_h$                                                   | <b>-2.4976820</b>                          | <b>-2.4628587</b>                          | <b>-2.4725025</b>                          |
| $\text{Sn}(\text{H}_2\text{O})_2^{2+} C_{2v}$                          | <b>-78.6112981</b>                         | <b>-78.5822197</b>                         | <b>-78.5856492</b>                         |
| $\text{Sn}(\text{H}_2\text{O})_2^{2+} D_{2d}$                          | -154.6844694                               | -154.6561475                               | -154.6581328                               |
| $\text{Sn}(\text{H}_2\text{O})_2^{2+} C_s$                             | -154.7077973                               | -154.6813850                               | -154.6803524                               |
| $\text{Sn}(\text{H}_2\text{O})_2^{2+} C_2$                             | <b>-154.7079465</b>                        | <b>-154.6815799</b>                        | <b>-154.6804476</b>                        |
| $\text{Sn}(\text{H}_2\text{O})_2^{2+} + \text{H}_2\text{O} C_s$        | $\text{SnOH}^+ + \text{H}_3\text{O}^+ C_s$ | $\text{SnOH}^+ + \text{H}_3\text{O}^+ C_s$ | $\text{SnOH}^+ + \text{H}_3\text{O}^+ C_s$ |
| $\text{SnOH}^+ + \text{H}_3\text{O}^+ C_s$                             | <b>-154.6925861</b>                        | <b>-154.6681461</b>                        | <b>-154.6643350</b>                        |
| $\text{Sn}(\text{H}_2\text{O})_3^{2+} D_{3h} \#1$                      | -230.7585184                               | -230.7306753                               | -230.7312716                               |
| $\text{Sn}(\text{H}_2\text{O})_3^{2+} D_{3h} \#2$                      | -230.7578208                               | -230.7298397                               | -230.7307192                               |
| $\text{Sn}(\text{H}_2\text{O})_3^{2+} D_3$                             | -230.7591167                               | -230.7312491                               | -230.7318750                               |
| $\text{Sn}(\text{H}_2\text{O})_3^{2+} C_{3v} \#1$                      | -230.7866025                               | -230.7616359                               | -230.7572787                               |
| $\text{Sn}(\text{H}_2\text{O})_3^{2+} C_{3v} \#2$                      | -230.7832867                               | -230.7578270                               | -230.7542790                               |
| $\text{Sn}(\text{H}_2\text{O})_3^{2+} C_3$                             | <b>-230.7917260</b>                        | <b>-230.7666933</b>                        | <b>-230.7621929</b>                        |
| $\text{Sn}(\text{H}_2\text{O})_2^{2+} + \text{H}_2\text{O} C_{2v}$     | <b>-230.7769536</b>                        | <b>-230.7516944</b>                        | <b>-230.7485694</b>                        |
| $\text{Sn}(\text{H}_2\text{O})_4^{2+} D_{2d} \#1$                      | -306.8219853                               | -306.7939497                               | -306.7939928                               |
| $\text{Sn}(\text{H}_2\text{O})_4^{2+} D_{2d} \#2$                      | -306.8219090                               | -306.7938756                               | -306.7939224                               |
| $\text{Sn}(\text{H}_2\text{O})_4^{2+} D_2$                             | $D_{2d} \#1$                               | $D_{2d} \#1$                               | $D_{2d} \#1$                               |
| $\text{Sn}(\text{H}_2\text{O})_4^{2+} S_4$                             | -306.8226755                               | -306.7946605                               | -306.7946393                               |
| $\text{Sn}(\text{H}_2\text{O})_4^{2+} C_{2v} \#1$                      | -306.8444100                               | -306.8193055                               | -306.8144601                               |
| $\text{Sn}(\text{H}_2\text{O})_4^{2+} C_{2v} \#2$                      | -306.8427195                               | -306.8179706                               | -306.8130096                               |
| $\text{Sn}(\text{H}_2\text{O})_4^{2+} C_{2v} \#3$                      | -306.8499170                               | -306.8253020                               | -306.8197822                               |
| $\text{Sn}(\text{H}_2\text{O})_4^{2+} C_2$                             | <b>-306.8500601</b>                        | <b>-306.8253687</b>                        | <b>-306.8199417</b>                        |
| $\text{Sn}(\text{H}_2\text{O})_3^{2+} + \text{H}_2\text{O} C_s \#1$    | -306.8510849                               | -306.8266512                               | -306.8208356                               |
| $\text{Sn}(\text{H}_2\text{O})_3^{2+} + \text{H}_2\text{O} C_s \#2$    | <b>-306.8518165</b>                        | <b>-306.8274239</b>                        | <b>-306.8215566</b>                        |
| $\text{Sn}(\text{H}_2\text{O})_5^{2+} C_{2v} \#1$                      | -382.9014525                               | -382.8765821                               | -382.8710536                               |
| $\text{Sn}(\text{H}_2\text{O})_5^{2+} C_{2v} \#2$                      | -382.8909851                               | -382.8652901                               | -382.8610975                               |
| $\text{Sn}(\text{H}_2\text{O})_5^{2+} C_{2v} \#3$                      | -382.8910309                               | -382.8660930                               | -382.8610184                               |
| $\text{Sn}(\text{H}_2\text{O})_5^{2+} C_{2v} \#4$                      | -382.8893169                               | -382.8639376                               | -382.8594786                               |
| $\text{Sn}(\text{H}_2\text{O})_5^{2+} C_s \#1$                         | <b>-382.9020192</b>                        | <b>-382.8771113</b>                        | <b>-382.8715255</b>                        |
| $\text{Sn}(\text{H}_2\text{O})_4^{2+} + \text{H}_2\text{O} C_{2v} \#1$ | -382.9023499                               | -382.8781321                               | -382.8717812                               |
| $\text{Sn}(\text{H}_2\text{O})_4^{2+} + \text{H}_2\text{O} C_{2v} \#2$ | -382.9018315                               | -382.8773238                               | -382.8712348                               |
| $\text{Sn}(\text{H}_2\text{O})_4^{2+} + \text{H}_2\text{O} C_2 \#1$    | -382.9030632                               | -382.8785857                               | -382.8724359                               |
| $\text{Sn}(\text{H}_2\text{O})_4^{2+} + \text{H}_2\text{O} C_s \#1$    | -382.9023949                               | -382.8781412                               | -382.8718450                               |
| $\text{Sn}(\text{H}_2\text{O})_4^{2+} + \text{H}_2\text{O} C_s \#2$    | -382.9043422                               | <b>-382.8800856</b>                        | -382.8735706                               |
| $\text{Sn}(\text{H}_2\text{O})_4^{2+} + \text{H}_2\text{O} C_I \#2$    | <b>-382.9043448</b>                        | n/a                                        | <b>-382.8735706</b>                        |
| $\text{Sn}(\text{H}_2\text{O})_5^{2+} C_s [4+1]$                       | <b>-382.9036049</b>                        | <b>-382.8792872</b>                        | <b>-382.8724747</b>                        |
| $\text{Sn}(\text{H}_2\text{O})_3^{2+} + 2\text{H}_2\text{O} C_s \#1$   | <b>-382.9042930</b>                        | <b>-382.8800374</b>                        | <b>-382.8734552</b>                        |

|                                                                         | HF/gen (5d)<br>M: CEP-121G*<br>OH: 6-31G* | HF/gen (5d)<br>M: LANL2DZ<br>OH: 6-31G*  | HF/gen (5d)<br>M: SDD<br>OH: 6-31G* |
|-------------------------------------------------------------------------|-------------------------------------------|------------------------------------------|-------------------------------------|
| $\text{Sn}(\text{H}_2\text{O})_6^{2+} T_h$                              | n-458.9251621                             | -458.8966175                             | -458.8956482                        |
| $\text{Sn}(\text{H}_2\text{O})_6^{2+} S_6$                              | -458.9251693                              | -458.8968061                             | -458.8957101                        |
| $\text{Sn}(\text{H}_2\text{O})_6^{2+} C_3$                              | -458.9442676                              | -458.9192268                             | -458.9135830                        |
| $\text{Sn}(\text{H}_2\text{O})_5^{2+} + \text{H}_2\text{O} C_s \#1$     | -458.9468911                              | -458.9224177                             | -458.9161571                        |
| $\text{Sn}(\text{H}_2\text{O})_5^{2+} + \text{H}_2\text{O} C_s \#2$     | <b>-458.9530390</b>                       | <b>-458.9284905</b>                      | <b>-458.9220996</b>                 |
| $\text{Sn}(\text{H}_2\text{O})_4^{2+} + 2\text{H}_2\text{O} C_{2v} \#1$ | -458.9519831                              | -458.9275680                             | -458.9214775                        |
| $\text{Sn}(\text{H}_2\text{O})_4^{2+} + 2\text{H}_2\text{O} C_2 \#1$    | <b>-458.9615350</b>                       | <b>-458.9376224</b>                      | <b>-458.9299845</b>                 |
| $\text{Sn}(\text{H}_2\text{O})_4^{2+} + 2\text{H}_2\text{O} C_s \#1$    | -458.9536329                              | -458.9294898                             | -458.9223920                        |
| $\text{Sn}(\text{H}_2\text{O})_4^{2+} + 2\text{H}_2\text{O} C_s \#2$    | <b>-458.9574340</b>                       | <b>-458.9334129</b>                      | <b>-458.9261302</b>                 |
| $\text{Sn}(\text{H}_2\text{O})_3^{2+} + 3\text{H}_2\text{O} C_{3v} \#1$ | <b>-458.9509318</b>                       | <b>-458.9268370</b>                      | <b>-458.9193977</b>                 |
| $\text{Sn}(\text{H}_2\text{O})_6^{2+} C_3 [3+3]$                        | <b>-458.9503789</b>                       | <b>-458.9265914</b>                      | <b>-458.9182573</b>                 |
| $\text{Sn}(\text{H}_2\text{O})_7^{2+} C_{2v} \#1$                       | [5+2]                                     | [5+2]                                    | [5+2]                               |
| $\text{Sn}(\text{H}_2\text{O})_7^{2+} C_{2v} \#2$                       | [5+2]                                     | [5+2]                                    | [5+2]                               |
| $\text{Sn}(\text{H}_2\text{O})_7^{2+} C_{2v} \#3$                       | [6+1]                                     | [6+1]                                    | [5+2]                               |
| $\text{Sn}(\text{H}_2\text{O})_7^{2+} C_{2v} \#4$                       | [5+2]                                     | [5+2]                                    | [5+2]                               |
| $\text{Sn}(\text{H}_2\text{O})_7^{2+} C_{2v} \#5$                       | -534.9535371                              | -534.9264668                             | -534.9240631                        |
| $\text{Sn}(\text{H}_2\text{O})_7^{2+} C_{2v} \#6$                       | -534.9576228                              | -534.9302713                             | -534.9281329                        |
| $\text{Sn}(\text{H}_2\text{O})_7^{2+} C_{2v} \#7$                       | -534.9572340                              | -534.9304144                             | -534.9272545                        |
| $\text{Sn}(\text{H}_2\text{O})_7^{2+} C_{2v} \#8$                       | [5+2]                                     | [5+2]                                    | [5+2]                               |
| $\text{Sn}(\text{H}_2\text{O})_7^{2+} C_{2v} \#9$                       | [5+2]                                     | [5+2]                                    | [5+2]                               |
| $\text{Sn}(\text{H}_2\text{O})_7^{2+} C_{2v} \#10$                      | [5+2]                                     | [5+2]                                    | [5+2]                               |
| $\text{Sn}(\text{H}_2\text{O})_7^{2+} C_{2v} \#11$                      | [6+1]<br>[4+3] -534.9686715               | [6+1] -534.9342016<br>[4+3] -534.9436517 | [4+3] -534.9378475                  |
| $\text{Sn}(\text{H}_2\text{O})_7^{2+} C_{2v} \#12$                      | [5+2]                                     | [5+2]                                    | [5+2]                               |
| $\text{Sn}(\text{H}_2\text{O})_7^{2+} C_{2v} \#13$                      | [4+3]                                     | [4+3]                                    | [4+3]                               |
| $\text{Sn}(\text{H}_2\text{O})_7^{2+} C_{2v} \#14$                      | [4+3]                                     | [4+3]                                    | [4+3]                               |
| $\text{Sn}(\text{H}_2\text{O})_7^{2+} C_{2v} \#15$                      | [5+2] -534.9719362                        | [5+2] -534.9467909                       | [5+2] -534.9410932                  |
| $\text{Sn}(\text{H}_2\text{O})_7^{2+} C_{2v} \#16$                      | -534.9657419                              | -534.9385240                             | -534.9359482                        |
| $\text{Sn}(\text{H}_2\text{O})_7^{2+} C_{2v} \#1 [5+2]$                 | -534.9876333                              | -534.9631520                             | -534.9564404                        |
| $\text{Sn}(\text{H}_2\text{O})_7^{2+} C_{2v} \#2 [5+2]$                 | -534.9770486                              | -534.9521860                             | -534.9463502                        |
| $\text{Sn}(\text{H}_2\text{O})_7^{2+} C_{2v} \#3 [5+2]$                 | -534.9759371                              | -534.9514724                             | -534.9452546                        |
| $\text{Sn}(\text{H}_2\text{O})_7^{2+} C_{2v} \#4 [5+2]$                 | -534.9776255                              | -534.9531545                             | -534.9468560                        |
| $\text{Sn}(\text{H}_2\text{O})_7^{2+} C_{2v} \#9 [5+2]$                 | -534.9857827                              | -534.9614882                             | -534.9546465                        |
| $\text{Sn}(\text{H}_2\text{O})_7^{2+} C_{2v} \#10 [5+2]$                | -534.9744169                              | -534.9497911                             | -534.9437513                        |
| $\text{Sn}(\text{H}_2\text{O})_7^{2+} C_{2v} \#11 [5+2]$                |                                           |                                          |                                     |
| $\text{Sn}(\text{H}_2\text{O})_7^{2+} C_{2v} \#12 [5+2]$                | -534.9740862                              | -534.9498937                             | -534.9433829                        |
| $\text{Sn}(\text{H}_2\text{O})_7^{2+} C_2 \#5$                          | [5+2]                                     | [5+2]                                    | [5+2]                               |
| $\text{Sn}(\text{H}_2\text{O})_7^{2+} C_2 \#6$                          | [5+2]                                     | [5+2]                                    | [5+2]                               |
| $\text{Sn}(\text{H}_2\text{O})_7^{2+} C_2 \#7$                          | [4+3]                                     | [4+3]                                    | [4+3]                               |
| $\text{Sn}(\text{H}_2\text{O})_7^{2+} C_2 \#16$                         | [5+2]                                     | [5+2]                                    | [5+2]                               |



|                                                                           | HF/gen (5d)<br>M: CEP-121G*<br>OH: 6-31G* | HF/gen (5d)<br>M: LANL2DZ<br>OH: 6-31G* | HF/gen (5d)<br>M: SDD<br>OH: 6-31G* |
|---------------------------------------------------------------------------|-------------------------------------------|-----------------------------------------|-------------------------------------|
| Sn(H <sub>2</sub> O) <sub>8</sub> <sup>2+</sup> <i>D</i> <sub>4h</sub> #1 | -610.9717840                              | -610.9427852                            | -610.9438852                        |
| Sn(H <sub>2</sub> O) <sub>8</sub> <sup>2+</sup> <i>D</i> <sub>4h</sub> #2 | -610.9720979                              | -610.9430417                            | -610.9440865                        |
| Sn(H <sub>2</sub> O) <sub>8</sub> <sup>2+</sup> <i>D</i> <sub>4d</sub> #1 | -610.9895323                              | -610.9610768                            | -610.9609642                        |
| Sn(H <sub>2</sub> O) <sub>8</sub> <sup>2+</sup> <i>D</i> <sub>4d</sub> #2 | -610.9873896                              | -610.9589987                            | -610.9590722                        |
| Sn(H <sub>2</sub> O) <sub>8</sub> <sup>2+</sup> <i>D</i> <sub>4</sub> #2  | -611.0002501                              | -610.9712586                            | -610.9710045                        |
| Sn(H <sub>2</sub> O) <sub>8</sub> <sup>2+</sup> <i>D</i> <sub>4</sub> #3  | <i>D</i> <sub>4</sub> #2                  | <i>D</i> <sub>4</sub> #2                | <i>D</i> <sub>4</sub> #2            |
| Sn(H <sub>2</sub> O) <sub>8</sub> <sup>2+</sup> <i>D</i> <sub>4</sub> #4  | <i>D</i> <sub>4</sub> #2                  | <i>D</i> <sub>4</sub> #2                | <i>D</i> <sub>4</sub> #2            |
| Sn(H <sub>2</sub> O) <sub>8</sub> <sup>2+</sup> <i>C</i> <sub>4h</sub> #1 | -610.9980519                              | -610.9691900                            | -610.9692277                        |
| Sn(H <sub>2</sub> O) <sub>8</sub> <sup>2+</sup> <i>C</i> <sub>4h</sub> #2 | <i>C</i> <sub>4h</sub> #1                 | <i>C</i> <sub>4h</sub> #1               | <i>C</i> <sub>4h</sub> #1           |
| Sn(H <sub>2</sub> O) <sub>8</sub> <sup>2+</sup> <i>C</i> <sub>4v</sub> #1 | -610.9904855                              | -610.9635865                            | -610.9617527                        |
| Sn(H <sub>2</sub> O) <sub>8</sub> <sup>2+</sup> <i>C</i> <sub>4v</sub> #2 | [4+4]                                     | [4+4]                                   | [4+4]                               |
| Sn(H <sub>2</sub> O) <sub>8</sub> <sup>2+</sup> <i>C</i> <sub>4v</sub> #3 | [4+4]                                     | [4+4]                                   | [4+4]                               |
| Sn(H <sub>2</sub> O) <sub>8</sub> <sup>2+</sup> <i>S</i> <sub>8</sub> #1  | -611.0014542                              | -610.9726486                            | -610.9719091                        |
| Sn(H <sub>2</sub> O) <sub>8</sub> <sup>2+</sup> <i>S</i> <sub>8</sub> #2  | <i>S</i> <sub>8</sub> #1                  | <i>S</i> <sub>8</sub> #1                | <i>S</i> <sub>8</sub> #1            |
| Sn(H <sub>2</sub> O) <sub>8</sub> <sup>2+</sup> <i>D</i> <sub>2d</sub> #1 | -610.9869206                              | -610.9580942                            | -610.9582983                        |
| Sn(H <sub>2</sub> O) <sub>8</sub> <sup>2+</sup> <i>D</i> <sub>2d</sub> #2 | -610.9842909                              | -610.9554446                            | -610.9555170                        |
| Sn(H <sub>2</sub> O) <sub>8</sub> <sup>2+</sup> <i>D</i> <sub>2d</sub> #3 | <i>D</i> <sub>2d</sub> #1                 | <i>D</i> <sub>2d</sub> #1               | <i>D</i> <sub>2d</sub> #1           |
| Sn(H <sub>2</sub> O) <sub>8</sub> <sup>2+</sup> <i>D</i> <sub>2d</sub> #4 | -610.9862435                              | -610.9573355                            | -610.9572626                        |
| Sn(H <sub>2</sub> O) <sub>8</sub> <sup>2+</sup> <i>D</i> <sub>2d</sub> #5 | -610.9989176                              | -610.9701312                            | -610.9698607                        |
| Sn(H <sub>2</sub> O) <sub>8</sub> <sup>2+</sup> <i>D</i> <sub>2h</sub> #1 | <i>D</i> <sub>4h</sub> #2                 | <i>D</i> <sub>4h</sub> #2               | <i>D</i> <sub>4h</sub> #2           |
| Sn(H <sub>2</sub> O) <sub>8</sub> <sup>2+</sup> <i>D</i> <sub>2h</sub> #3 | -610.9919901                              | -610.9633412                            | -610.9632692                        |
| Sn(H <sub>2</sub> O) <sub>8</sub> <sup>2+</sup> <i>D</i> <sub>2h</sub> #4 | <i>D</i> <sub>2h</sub> #3                 | <i>D</i> <sub>2h</sub> #3               | <i>D</i> <sub>2h</sub> #3           |
| Sn(H <sub>2</sub> O) <sub>8</sub> <sup>2+</sup> <i>C</i> <sub>2v</sub> #1 | -610.9983511                              | [4+4]                                   | -610.9686482                        |
| Sn(H <sub>2</sub> O) <sub>8</sub> <sup>2+</sup> <i>C</i> <sub>2v</sub> #2 | <i>C</i> <sub>2v</sub> #1                 | -610.9722860                            | <i>C</i> <sub>2v</sub> #1           |
| Sn(H <sub>2</sub> O) <sub>8</sub> <sup>2+</sup> <i>C</i> <sub>2v</sub> #3 | [4+4]                                     | [4+4]                                   | [4+4]                               |
| Sn(H <sub>2</sub> O) <sub>8</sub> <sup>2+</sup> <i>C</i> <sub>2v</sub> #4 | [4+4]                                     | [4+4]                                   | -610.9555672                        |
| Sn(H <sub>2</sub> O) <sub>8</sub> <sup>2+</sup> <i>C</i> <sub>2v</sub> #6 | [6+2]                                     | [6+2]                                   | [6+2]                               |
| Sn(H <sub>2</sub> O) <sub>8</sub> <sup>2+</sup> <i>C</i> <sub>4</sub> #1  | [4+4]                                     | [4+4]                                   | [4+4]                               |
| Sn(H <sub>2</sub> O) <sub>8</sub> <sup>2+</sup> <i>C</i> <sub>4</sub> #3  | <i>S</i> <sub>8</sub> #1                  | [4+4]                                   | -610.9721317                        |
| Sn(H <sub>2</sub> O) <sub>8</sub> <sup>2+</sup> <i>S</i> <sub>4</sub> #2  | -610.9989261                              | <i>D</i> <sub>2d</sub> #5               | <i>D</i> <sub>2d</sub> #5           |
| Sn(H <sub>2</sub> O) <sub>8</sub> <sup>2+</sup> <i>S</i> <sub>4</sub> #3  | <i>S</i> <sub>4</sub> #2                  | <i>D</i> <sub>2d</sub> #5               | <i>D</i> <sub>2d</sub> #5           |
| Sn(H <sub>2</sub> O) <sub>8</sub> <sup>2+</sup> <i>S</i> <sub>4</sub> #4  | -610.9987746                              | -610.9699202                            | <i>D</i> <sub>2d</sub> #5           |
| Sn(H <sub>2</sub> O) <sub>8</sub> <sup>2+</sup> <i>S</i> <sub>4</sub> #5  | <i>S</i> <sub>4</sub> #2                  | <i>D</i> <sub>2d</sub> #5               | -610.9698614                        |
| Sn(H <sub>2</sub> O) <sub>8</sub> <sup>2+</sup> <i>D</i> <sub>2</sub> #2  | <i>D</i> <sub>4</sub> #2                  | <i>D</i> <sub>4</sub> #2                | <i>D</i> <sub>4</sub> #2            |
| Sn(H <sub>2</sub> O) <sub>8</sub> <sup>2+</sup> <i>D</i> <sub>2</sub> #3  | <i>D</i> <sub>4</sub> #2                  | <i>D</i> <sub>4</sub> #2                | <i>D</i> <sub>4</sub> #2            |
| Sn(H <sub>2</sub> O) <sub>8</sub> <sup>2+</sup> <i>D</i> <sub>2</sub> #4  | <i>D</i> <sub>4</sub> #2                  | <i>D</i> <sub>4</sub> #2                | <i>D</i> <sub>4</sub> #2            |
| Sn(H <sub>2</sub> O) <sub>8</sub> <sup>2+</sup> <i>D</i> <sub>2</sub> #5  | <i>D</i> <sub>4</sub> #2                  | <i>D</i> <sub>4</sub> #2                | <i>D</i> <sub>4</sub> #2            |
| Sn(H <sub>2</sub> O) <sub>8</sub> <sup>2+</sup> <i>D</i> <sub>2</sub> #7  | <i>D</i> <sub>4</sub> #2                  | <i>D</i> <sub>4</sub> #2                | <i>D</i> <sub>4</sub> #2            |
| Sn(H <sub>2</sub> O) <sub>8</sub> <sup>2+</sup> <i>C</i> <sub>2h</sub> #2 | <i>C</i> <sub>4h</sub> #1                 | <i>C</i> <sub>4h</sub> #1               | <i>C</i> <sub>4h</sub> #1           |
| Sn(H <sub>2</sub> O) <sub>8</sub> <sup>2+</sup> <i>C</i> <sub>2</sub> #1  | [4+4]                                     | n/a                                     | [4+4]                               |
| Sn(H <sub>2</sub> O) <sub>8</sub> <sup>2+</sup> <i>C</i> <sub>2</sub> #2  | n/a                                       | [4+4]                                   | n/a                                 |
| Sn(H <sub>2</sub> O) <sub>8</sub> <sup>2+</sup> <i>C</i> <sub>2</sub> #3  | n/a                                       | n/a                                     | [4+2+2]                             |

|                                                         |                                           |                                         |                                     |
|---------------------------------------------------------|-------------------------------------------|-----------------------------------------|-------------------------------------|
| $\text{Sn}(\text{H}_2\text{O})_8^{2+} C_2 \#6$          | [4+4]                                     | n/a                                     | n/a                                 |
| $\text{Sn}(\text{H}_2\text{O})_8^{2+} C_2 \#7$          | [4+2+2]                                   | [4+2+2]                                 | n/a                                 |
|                                                         | HF/gen (5d)<br>M: CEP-121G*<br>OH: 6-31G* | HF/gen (5d)<br>M: LANL2DZ<br>OH: 6-31G* | HF/gen (5d)<br>M: SDD<br>OH: 6-31G* |
| $\text{Sn}(\text{H}_2\text{O})_9^{2+} D_{3h} \#1$       | 687.0188543                               | -686.9903997                            | -686.9907756                        |
| $\text{Sn}(\text{H}_2\text{O})_9^{2+} D_{3h} \#2$       | -686.9985501                              | -686.9696936                            | -686.9713239                        |
| $\text{Sn}(\text{H}_2\text{O})_9^{2+} D_{3h} \#3$       | -687.0059230                              | -686.9771705                            | -686.9770349                        |
| $\text{Sn}(\text{H}_2\text{O})_9^{2+} D_{3h} \#4$       | -687.0217424                              | -686.9928868                            | -686.9930307                        |
| $\text{Sn}(\text{H}_2\text{O})_9^{2+} D_3 \#1$          | -687.0296007                              | -687.0010788                            | -687.0010402                        |
| $\text{Sn}(\text{H}_2\text{O})_9^{2+} D_3 \#2$          | $D_3 \#1$                                 | $D_3 \#1$                               | $D_3 \#1$                           |
| $\text{Sn}(\text{H}_2\text{O})_9^{2+} D_3 \#3$          | [6+3]                                     | [6+3]                                   | [6+3]                               |
| $\text{Sn}(\text{H}_2\text{O})_9^{2+} D_3 \#4$          | $D_3 \#1$                                 | $D_3 \#1$                               | $D_3 \#1$                           |
| $\text{Sn}(\text{H}_2\text{O})_9^{2+} D_3 [6+3]$        | -687.0584528                              | -687.0301581                            | -687.0281723                        |
| $\text{Sn}(\text{H}_2\text{O})_9^{2+} C_{3h} \#1$       | -687.0273099                              | -686.9988300                            | -686.9988503                        |
| $\text{Sn}(\text{H}_2\text{O})_9^{2+} C_{3h} \#2$       | -687.0253427                              | -686.9968895                            | -686.9971127                        |
| $\text{Sn}(\text{H}_2\text{O})_9^{2+} C_{3h} \#3$       | $C_{3h} \#1$                              | $C_{3h} \#1$                            | $C_{3h} \#1$                        |
| $\text{Sn}(\text{H}_2\text{O})_9^{2+} C_{3h} \#4$       | $C_{3h} \#2$                              | $C_{3h} \#2$                            | $C_{3h} \#2$                        |
| $\text{Sn}(\text{H}_2\text{O})_9^{2+} C_{3v} \#1$       | -687.0194802                              | -686.9920016                            | -686.9908228                        |
| $\text{Sn}(\text{H}_2\text{O})_9^{2+} C_{3v} \#2$       | [6+3]                                     | [6+3]                                   | [6+3]                               |
| $\text{Sn}(\text{H}_2\text{O})_9^{2+} C_{3v} \#3$       | [6+3]                                     | [6+3]                                   | [6+3]                               |
| $\text{Sn}(\text{H}_2\text{O})_9^{2+} C_{3v} \#4$       | -687.0230789                              | -686.9955808                            | -686.9938103                        |
| $\text{Sn}(\text{H}_2\text{O})_9^{2+} C_{3v} \#2 [6+3]$ | -687.0439978                              | -687.0193439                            | -687.0132442                        |
| $\text{Sn}(\text{H}_2\text{O})_9^{2+} C_{3v} \#3 [6+3]$ | -687.0464853                              | -687.0196851                            | -687.0160018                        |
| $\text{Sn}(\text{H}_2\text{O})_9^{2+} C_3 \#1$          | [6+3]                                     | [6+3]                                   | [6+3]                               |
| $\text{Sn}(\text{H}_2\text{O})_9^{2+} C_3 \#2$          | $C_3 \#3 [6+3]$                           | $C_3 \#3 [6+3]$                         | $C_3 \#3 [6+3]$                     |
| $\text{Sn}(\text{H}_2\text{O})_9^{2+} C_3 \#3$          | $C_3 \#3 [6+3]$                           | $C_3 \#3 [6+3]$                         | $C_3 \#3 [6+3]$                     |
| $\text{Sn}(\text{H}_2\text{O})_9^{2+} C_3 \#4$          | $C_3 \#1 [6+3]$                           | $C_3 \#1 [6+3]$                         | $C_3 \#1 [6+3]$                     |
| $\text{Sn}(\text{H}_2\text{O})_9^{2+} C_3 \#5$          | $C_3 \#1 [6+3]$                           | $C_3 \#1 [6+3]$                         | $C_3 \#1 [6+3]$                     |
| $\text{Sn}(\text{H}_2\text{O})_9^{2+} C_3 \#1 [6+3]$    | -687.0575126                              | -687.0322417                            | -687.0262950                        |
| $\text{Sn}(\text{H}_2\text{O})_9^{2+} C_3 \#3 [6+3]$    | <b>-687.0507717</b>                       | -687.0250467                            | <b>-687.0189766</b>                 |
| $\text{Sn}(\text{H}_2\text{O})_{18}^{2+} T [6+12]$      | -1371.3599113                             | -1371.3311860                           | -1371.3283559                       |

|                                                                        | HF/gen (5d)<br>M: CEP-121G*<br>OH: 6-31+G* | HF/gen (5d)<br>M: LANL2DZ<br>OH: 6-31+G*   | HF/gen (5d)<br>M: SDD<br>OH: 6-31+G*       |
|------------------------------------------------------------------------|--------------------------------------------|--------------------------------------------|--------------------------------------------|
| $\text{Sn}^{2+} K_h$                                                   | <b>-2.4976820</b>                          | <b>-2.4628587</b>                          | <b>-2.4725025</b>                          |
| $\text{Sn}(\text{H}_2\text{O})_2^{2+} C_{2v}$                          | <b>-78.6143605</b>                         | <b>-78.5908722</b>                         | <b>-78.5934649</b>                         |
| $\text{Sn}(\text{H}_2\text{O})_2^{2+} D_{2d}$                          | -154.6918891                               | -154.6690314                               | -154.6704474                               |
| $\text{Sn}(\text{H}_2\text{O})_2^{2+} C_s$                             | -154.7135829                               | -154.6924351                               | -154.6912806                               |
| $\text{Sn}(\text{H}_2\text{O})_2^{2+} C_2$                             | <b>-154.7138172</b>                        | <b>-154.6927306</b>                        | <b>-154.6914586</b>                        |
| $\text{Sn}(\text{H}_2\text{O})_2^{2+} + \text{H}_2\text{O} C_s$        | $\text{SnOH}^+ + \text{H}_3\text{O}^+ C_s$ | $\text{SnOH}^+ + \text{H}_3\text{O}^+ C_s$ | $\text{SnOH}^+ + \text{H}_3\text{O}^+ C_s$ |
| $\text{SnOH}^+ + \text{H}_3\text{O}^+ C_s$                             | <b>-154.7022643</b>                        | <b>-154.6791322</b>                        | <b>-154.6752057</b>                        |
| $\text{Sn}(\text{H}_2\text{O})_3^{2+} D_{3h} \#1$                      | -230.7698891                               | -230.7476162                               | -230.7481216                               |
| $\text{Sn}(\text{H}_2\text{O})_3^{2+} D_{3h} \#2$                      | -230.7696542                               | -230.7472791                               | -230.7478652                               |
| $\text{Sn}(\text{H}_2\text{O})_3^{2+} D_3$                             | -230.7706780                               | -230.7484233                               | -230.7488863                               |
| $\text{Sn}(\text{H}_2\text{O})_3^{2+} C_{3v} \#1$                      | -230.7961481                               | -230.7743712                               | -230.7704986                               |
| $\text{Sn}(\text{H}_2\text{O})_3^{2+} C_{3v} \#2$                      | -230.7928848                               | -230.7708087                               | -230.7677221                               |
| $\text{Sn}(\text{H}_2\text{O})_3^{2+} C_3$                             | <b>-230.8010769</b>                        | <b>-230.7794075</b>                        | <b>-230.7753601</b>                        |
| $\text{Sn}(\text{H}_2\text{O})_2^{2+} + \text{H}_2\text{O} C_{2v}$     | <b>-230.7865643</b>                        | <b>-230.7657369</b>                        | <b>-230.7626612</b>                        |
| $\text{Sn}(\text{H}_2\text{O})_4^{2+} D_{2d} \#1$                      | -306.8397366                               | -306.8155985                               | -306.8156442                               |
| $\text{Sn}(\text{H}_2\text{O})_4^{2+} D_{2d} \#2$                      | -306.8396938                               | -306.8154921                               | -306.8155494                               |
| $\text{Sn}(\text{H}_2\text{O})_4^{2+} D_2$                             | -306.8397390                               | -306.8156511                               | -306.8156510                               |
| $\text{Sn}(\text{H}_2\text{O})_4^{2+} S_4$                             | -306.8405538                               | -306.8164177                               | -306.8163866                               |
| $\text{Sn}(\text{H}_2\text{O})_4^{2+} C_{2v} \#1$                      | -306.8589217                               | -306.8359758                               | -306.8318332                               |
| $\text{Sn}(\text{H}_2\text{O})_4^{2+} C_{2v} \#2$                      | -306.8575859                               | -306.8346902                               | -306.8304345                               |
| $\text{Sn}(\text{H}_2\text{O})_4^{2+} C_{2v} \#3$                      | -306.8644197                               | <b>-306.8418910</b>                        | -306.8370052                               |
| $\text{Sn}(\text{H}_2\text{O})_4^{2+} C_2$                             | <b>-306.8644202</b>                        | n/a                                        | <b>-306.8370222</b>                        |
| $\text{Sn}(\text{H}_2\text{O})_3^{2+} + \text{H}_2\text{O} C_s \#1$    | -306.8640430                               | -306.8425403                               | -306.8372779                               |
| $\text{Sn}(\text{H}_2\text{O})_3^{2+} + \text{H}_2\text{O} C_s \#2$    | <b>-306.8650045</b>                        | <b>-306.8435189</b>                        | <b>-306.8382200</b>                        |
| $\text{Sn}(\text{H}_2\text{O})_5^{2+} C_{2v} \#1$                      | -382.9220253                               | -382.8983230                               | -382.8936207                               |
| $\text{Sn}(\text{H}_2\text{O})_5^{2+} C_{2v} \#2$                      | -382.9117006                               | -382.8873648                               | -382.8839056                               |
| $\text{Sn}(\text{H}_2\text{O})_5^{2+} C_{2v} \#3$                      | -382.9120197                               | -382.8881638                               | -382.8839382                               |
| $\text{Sn}(\text{H}_2\text{O})_5^{2+} C_{2v} \#4$                      | -382.9108196                               | -382.8866029                               | -382.8829158                               |
| $\text{Sn}(\text{H}_2\text{O})_5^{2+} C_s \#1$                         | <b>-382.9220910</b>                        | <b>-382.8985032</b>                        | <b>-382.8936997</b>                        |
| $\text{Sn}(\text{H}_2\text{O})_4^{2+} + \text{H}_2\text{O} C_{2v} \#1$ | -382.9213296                               | -382.8987349                               | -382.8931747                               |
| $\text{Sn}(\text{H}_2\text{O})_4^{2+} + \text{H}_2\text{O} C_{2v} \#2$ | -382.9202418                               | -382.8974042                               | -382.8920767                               |
| $\text{Sn}(\text{H}_2\text{O})_4^{2+} + \text{H}_2\text{O} C_2 \#1$    | -382.9215737                               | -382.8988518                               | -382.8934215                               |
| $\text{Sn}(\text{H}_2\text{O})_4^{2+} + \text{H}_2\text{O} C_s \#1$    | -382.9213959                               | -382.8987810                               | -382.8933015                               |
| $\text{Sn}(\text{H}_2\text{O})_4^{2+} + \text{H}_2\text{O} C_s \#2$    | <b>-382.9226809</b>                        | <b>-382.9001461</b>                        | <b>-382.8943895</b>                        |
| $\text{Sn}(\text{H}_2\text{O})_5^{2+} C_s [4+1]$                       | <b>-382.9224126</b>                        | <b>-382.8999833</b>                        | <b>-382.8939753</b>                        |
| $\text{Sn}(\text{H}_2\text{O})_3^{2+} + 2\text{H}_2\text{O} C_s \#1$   | <b>-382.9211426</b>                        | <b>-382.8995737</b>                        | <b>-382.8936227</b>                        |

|                                                                         | HF/gen (5d)<br>M: CEP-121G*<br>OH: 6-31+G* | HF/gen (5d)<br>M: LANL2DZ<br>OH: 6-31+G* | HF/gen (5d)<br>M: SDD<br>OH: 6-31+G* |
|-------------------------------------------------------------------------|--------------------------------------------|------------------------------------------|--------------------------------------|
| $\text{Sn}(\text{H}_2\text{O})_6^{2+} T_h$                              | -458.9577374                               | -458.9313478                             | -458.9301383                         |
| $\text{Sn}(\text{H}_2\text{O})_6^{2+} C_3$                              | -458.9698554                               | -458.9463441                             | -458.9414434                         |
| $\text{Sn}(\text{H}_2\text{O})_5^{2+} + \text{H}_2\text{O} C_s \#1$     | -458.9717347                               | -458.9482898                             | -458.9429658                         |
| $\text{Sn}(\text{H}_2\text{O})_5^{2+} + \text{H}_2\text{O} C_s \#2$     | <b>-458.9773796</b>                        | <b>-458.9539785</b>                      | <b>-458.9484676</b>                  |
| $\text{Sn}(\text{H}_2\text{O})_4^{2+} + 2\text{H}_2\text{O} C_{2v} \#1$ | -458.9738396                               | -458.9514764                             | -458.9462531                         |
| $\text{Sn}(\text{H}_2\text{O})_4^{2+} + 2\text{H}_2\text{O} C_2 \#1$    | <b>-458.9831957</b>                        | <b>-458.9612049</b>                      | <b>-458.9544150</b>                  |
| $\text{Sn}(\text{H}_2\text{O})_4^{2+} + 2\text{H}_2\text{O} C_s \#1$    | -458.9755016                               | -458.9532637                             | -458.9469872                         |
| $\text{Sn}(\text{H}_2\text{O})_4^{2+} + 2\text{H}_2\text{O} C_s \#2$    | <b>-458.9791773</b>                        | <b>-458.9570347</b>                      | <b>-458.9505256</b>                  |
| $\text{Sn}(\text{H}_2\text{O})_3^{2+} + 3\text{H}_2\text{O} C_{3v} \#1$ | <b>-458.9716088</b>                        | <b>-458.9498670</b>                      | <b>-458.9429896</b>                  |
| $\text{Sn}(\text{H}_2\text{O})_6^{2+} C_3 [3+3]$                        | <b>-458.9733173</b>                        | <b>-458.9519122</b>                      | <b>-458.9443719</b>                  |
| $\text{Sn}(\text{H}_2\text{O})_7^{2+} C_{2v} \#1$                       | [5+2]                                      | [5+2]                                    | [5+2]                                |
| $\text{Sn}(\text{H}_2\text{O})_7^{2+} C_{2v} \#2$                       | [5+2]                                      | [5+2]                                    | [5+2]                                |
| $\text{Sn}(\text{H}_2\text{O})_7^{2+} C_{2v} \#3$                       | [6+1]                                      | [6+1]                                    | [6+1]                                |
| $\text{Sn}(\text{H}_2\text{O})_7^{2+} C_{2v} \#4$                       | [5+2]                                      | [5+2]                                    | [5+2]                                |
| $\text{Sn}(\text{H}_2\text{O})_7^{2+} C_{2v} \#5$                       | -534.9868134                               | -534.9612552                             | -534.9598816                         |
| $\text{Sn}(\text{H}_2\text{O})_7^{2+} C_{2v} \#6$                       | -534.9925789                               | -534.9663938                             | -534.9654920                         |
| $\text{Sn}(\text{H}_2\text{O})_7^{2+} C_{2v} \#7$                       | -534.9895593                               | -534.9645234                             | -534.9621255                         |
| $\text{Sn}(\text{H}_2\text{O})_7^{2+} C_{2v} \#8$                       | -534.9996800                               | -534.9745506                             | -534.9721574                         |
| $\text{Sn}(\text{H}_2\text{O})_7^{2+} C_{2v} \#9$                       | [5+2]                                      | [5+2]                                    | [5+2]                                |
| $\text{Sn}(\text{H}_2\text{O})_7^{2+} C_{2v} \#10$                      | [5+2]                                      | [5+2]                                    | [5+2]                                |
| $\text{Sn}(\text{H}_2\text{O})_7^{2+} C_{2v} \#11$                      | [6+1]<br>[4+3] -535.0010909                | [6+1]<br>[4+3] -534.9773876              | [6+1]<br>[4+3] -534.9726580          |
| $\text{Sn}(\text{H}_2\text{O})_7^{2+} C_{2v} \#12$                      | [5+2]                                      | [5+2]                                    | [5+2]                                |
| $\text{Sn}(\text{H}_2\text{O})_7^{2+} C_{2v} \#13$                      | [4+3]                                      | [4+3]                                    | [4+3]                                |
| $\text{Sn}(\text{H}_2\text{O})_7^{2+} C_{2v} \#14$                      | [4+3]                                      | [4+3]                                    | [4+3]                                |
| $\text{Sn}(\text{H}_2\text{O})_7^{2+} C_{2v} \#15$                      | [5+2] -535.0042543                         | [5+2] -534.9805995                       | -534.9742579<br>[5+2] -534.9760433   |
| $\text{Sn}(\text{H}_2\text{O})_7^{2+} C_{2v} \#16$                      | -535.0012735                               | -534.9755810                             | -534.9740954                         |
| $\text{Sn}(\text{H}_2\text{O})_7^{2+} C_{2v} \#1 [5+2]$                 | -535.0182363                               | -534.9949639                             | -534.9892807                         |
| $\text{Sn}(\text{H}_2\text{O})_7^{2+} C_{2v} \#2 [5+2]$                 | -535.0084745                               | -534.9847397                             | -534.9799790                         |
| $\text{Sn}(\text{H}_2\text{O})_7^{2+} C_{2v} \#3 [5+2]$                 | -535.0068429                               | -534.9833732                             | -534.9782715                         |
| $\text{Sn}(\text{H}_2\text{O})_7^{2+} C_{2v} \#4 [5+2]$                 | -534.9850796                               | -534.9799313                             | -534.9699017                         |
| $\text{Sn}(\text{H}_2\text{O})_7^{2+} C_{2v} \#9 [5+2]$                 | -535.0164925                               | -534.9933033                             | -534.9873568                         |
| $\text{Sn}(\text{H}_2\text{O})_7^{2+} C_{2v} \#10 [5+2]$                | -535.0059803                               | -534.9823485                             | -534.9772498                         |
| $\text{Sn}(\text{H}_2\text{O})_7^{2+} C_{2v} \#11 [5+2]$                |                                            |                                          |                                      |
| $\text{Sn}(\text{H}_2\text{O})_7^{2+} C_{2v} \#12 [5+2]$                | -535.0050221                               | -534.9817290                             | -534.9762500                         |
| $\text{Sn}(\text{H}_2\text{O})_7^{2+} C_2 \#5$                          | [5+2]                                      | [5+2]                                    | [5+2]                                |
| $\text{Sn}(\text{H}_2\text{O})_7^{2+} C_2 \#6$                          | [5+2]                                      | [5+2]                                    | [5+2]                                |
| $\text{Sn}(\text{H}_2\text{O})_7^{2+} C_2 \#7$                          | [4+3]                                      | [4+3]                                    | [4+3]                                |
| $\text{Sn}(\text{H}_2\text{O})_7^{2+} C_2 \#8$                          | [5+2]                                      | [5+2]                                    | [5+2]                                |
| $\text{Sn}(\text{H}_2\text{O})_7^{2+} C_2 \#15$                         | n/a                                        | n/a                                      | [4+3]                                |
| $\text{Sn}(\text{H}_2\text{O})_7^{2+} C_2 \#16$                         | [5+2]                                      | [5+2]                                    | [5+2]                                |

|                                                                           | HF/gen (5d)<br>M: CEP-121G*<br>OH: 6-31+G* | HF/gen (5d)<br>M: LANL2DZ<br>OH: 6-31+G* | HF/gen (5d)<br>M: SDD<br>OH: 6-31+G* |
|---------------------------------------------------------------------------|--------------------------------------------|------------------------------------------|--------------------------------------|
| Sn(H <sub>2</sub> O) <sub>8</sub> <sup>2+</sup> <i>D</i> <sub>4h</sub> #1 | -611.0118544                               | -610.9856679                             | -610.9866285                         |
| Sn(H <sub>2</sub> O) <sub>8</sub> <sup>2+</sup> <i>D</i> <sub>4h</sub> #2 | -611.0120609                               | -610.9858379                             | -610.9867869                         |
| Sn(H <sub>2</sub> O) <sub>8</sub> <sup>2+</sup> <i>D</i> <sub>4d</sub> #1 | -611.0301936                               | -611.0041855                             | -611.0036332                         |
| Sn(H <sub>2</sub> O) <sub>8</sub> <sup>2+</sup> <i>D</i> <sub>4d</sub> #2 | -611.0292503                               | -611.0034038                             | -611.0029194                         |
| Sn(H <sub>2</sub> O) <sub>8</sub> <sup>2+</sup> <i>D</i> <sub>4</sub> #1  | <i>D</i> <sub>4</sub> #2                   | n/a                                      | n/a                                  |
| Sn(H <sub>2</sub> O) <sub>8</sub> <sup>2+</sup> <i>D</i> <sub>4</sub> #2  | -611.0417828                               | -611.0154656                             | -611.0147582                         |
| Sn(H <sub>2</sub> O) <sub>8</sub> <sup>2+</sup> <i>D</i> <sub>4</sub> #3  | <i>D</i> <sub>4</sub> #2                   | <i>D</i> <sub>4</sub> #2                 | <i>D</i> <sub>4</sub> #2             |
| Sn(H <sub>2</sub> O) <sub>8</sub> <sup>2+</sup> <i>D</i> <sub>4</sub> #4  | <i>D</i> <sub>4</sub> #2                   | <i>D</i> <sub>4</sub> #2                 | <i>D</i> <sub>4</sub> #2             |
| Sn(H <sub>2</sub> O) <sub>8</sub> <sup>2+</sup> <i>C</i> <sub>4h</sub> #1 | -611.0390117                               | -611.0128614                             | -611.0125798                         |
| Sn(H <sub>2</sub> O) <sub>8</sub> <sup>2+</sup> <i>C</i> <sub>4h</sub> #2 | <i>C</i> <sub>4h</sub> #1                  | <i>C</i> <sub>4h</sub> #1                | <i>C</i> <sub>4h</sub> #1            |
| Sn(H <sub>2</sub> O) <sub>8</sub> <sup>2+</sup> <i>C</i> <sub>4v</sub> #1 | n/a                                        | -611.0043345                             | n/a                                  |
| Sn(H <sub>2</sub> O) <sub>8</sub> <sup>2+</sup> <i>C</i> <sub>4v</sub> #2 | [4+4]                                      | [4+4]                                    | n/a                                  |
| Sn(H <sub>2</sub> O) <sub>8</sub> <sup>2+</sup> <i>C</i> <sub>4v</sub> #3 | [4+4]                                      | [4+4]                                    | [4+4]                                |
| Sn(H <sub>2</sub> O) <sub>8</sub> <sup>2+</sup> <i>S</i> <sub>8</sub> #1  | -611.0441443                               | -611.0181132                             | -611.0169262                         |
| Sn(H <sub>2</sub> O) <sub>8</sub> <sup>2+</sup> <i>S</i> <sub>8</sub> #2  | <i>S</i> <sub>8</sub> #1                   | <i>S</i> <sub>8</sub> #1                 | <i>S</i> <sub>8</sub> #1             |
| Sn(H <sub>2</sub> O) <sub>8</sub> <sup>2+</sup> <i>D</i> <sub>2d</sub> #1 | -611.0278013                               | -611.0016631                             | -611.0018115                         |
| Sn(H <sub>2</sub> O) <sub>8</sub> <sup>2+</sup> <i>D</i> <sub>2d</sub> #2 | -611.0264785                               | -611.0004108                             | -611.0001994                         |
| Sn(H <sub>2</sub> O) <sub>8</sub> <sup>2+</sup> <i>D</i> <sub>2d</sub> #3 | <i>D</i> <sub>2d</sub> #1                  | <i>D</i> <sub>2d</sub> #1                | <i>D</i> <sub>2d</sub> #1            |
| Sn(H <sub>2</sub> O) <sub>8</sub> <sup>2+</sup> <i>D</i> <sub>2d</sub> #4 | -611.0264062                               | -610.9999642                             | -610.9997186                         |
| Sn(H <sub>2</sub> O) <sub>8</sub> <sup>2+</sup> <i>D</i> <sub>2d</sub> #5 | -611.0407156                               | -611.0146963                             | -611.0141323                         |
| Sn(H <sub>2</sub> O) <sub>8</sub> <sup>2+</sup> <i>D</i> <sub>2h</sub> #1 | <i>D</i> <sub>4h</sub> #2                  | <i>D</i> <sub>4h</sub> #2                | <i>D</i> <sub>4h</sub> #2            |
| Sn(H <sub>2</sub> O) <sub>8</sub> <sup>2+</sup> <i>D</i> <sub>2h</sub> #3 | -611.0335509                               | -611.0074859                             | -611.0072190                         |
| Sn(H <sub>2</sub> O) <sub>8</sub> <sup>2+</sup> <i>D</i> <sub>2h</sub> #4 | <i>D</i> <sub>2h</sub> #3                  | <i>D</i> <sub>2h</sub> #3                | <i>D</i> <sub>2h</sub> #3            |
| Sn(H <sub>2</sub> O) <sub>8</sub> <sup>2+</sup> <i>C</i> <sub>2v</sub> #1 | -611.0376513                               | 611.0125362                              | -611.0104164                         |
| Sn(H <sub>2</sub> O) <sub>8</sub> <sup>2+</sup> <i>C</i> <sub>2v</sub> #2 | <i>C</i> <sub>2v</sub> #1                  | <i>C</i> <sub>2v</sub> #1                | <i>C</i> <sub>2v</sub> #1            |
| Sn(H <sub>2</sub> O) <sub>8</sub> <sup>2+</sup> <i>C</i> <sub>2v</sub> #3 | [4+4]                                      | [4+4]                                    | [4+4]                                |
| Sn(H <sub>2</sub> O) <sub>8</sub> <sup>2+</sup> <i>C</i> <sub>2v</sub> #4 | -611.0265907                               | [4+4]                                    | n/a                                  |
| Sn(H <sub>2</sub> O) <sub>8</sub> <sup>2+</sup> <i>C</i> <sub>2v</sub> #6 | [6+2]                                      | [6+2]                                    | [6+2]                                |
| Sn(H <sub>2</sub> O) <sub>8</sub> <sup>2+</sup> <i>C</i> <sub>4</sub> #1  | [4+4]                                      | [4+4]                                    | [4+4]                                |
| Sn(H <sub>2</sub> O) <sub>8</sub> <sup>2+</sup> <i>C</i> <sub>4</sub> #3  | <i>S</i> <sub>8</sub> #1                   | [4+4]                                    | <i>S</i> <sub>8</sub> #1             |
| Sn(H <sub>2</sub> O) <sub>8</sub> <sup>2+</sup> <i>S</i> <sub>4</sub> #2  | <i>D</i> <sub>2d</sub> #5                  | -611.0137495                             | <i>D</i> <sub>2d</sub> #5            |
| Sn(H <sub>2</sub> O) <sub>8</sub> <sup>2+</sup> <i>S</i> <sub>4</sub> #3  | <i>D</i> <sub>2d</sub> #5                  | <i>S</i> <sub>4</sub> #2                 | <i>D</i> <sub>2d</sub> #5            |
| Sn(H <sub>2</sub> O) <sub>8</sub> <sup>2+</sup> <i>S</i> <sub>4</sub> #4  | -611.0400451                               | <i>S</i> <sub>4</sub> #2                 | <i>D</i> <sub>2d</sub> #5            |
| Sn(H <sub>2</sub> O) <sub>8</sub> <sup>2+</sup> <i>D</i> <sub>2</sub> #2  | <i>D</i> <sub>4</sub> #2                   | <i>D</i> <sub>4</sub> #2                 | <i>D</i> <sub>4</sub> #2             |
| Sn(H <sub>2</sub> O) <sub>8</sub> <sup>2+</sup> <i>D</i> <sub>2</sub> #3  | <i>D</i> <sub>4</sub> #2                   | <i>D</i> <sub>4</sub> #2                 | <i>D</i> <sub>4</sub> #2             |
| Sn(H <sub>2</sub> O) <sub>8</sub> <sup>2+</sup> <i>D</i> <sub>2</sub> #4  | <i>D</i> <sub>4</sub> #2                   | <i>D</i> <sub>4</sub> #2                 | <i>D</i> <sub>4</sub> #2             |
| Sn(H <sub>2</sub> O) <sub>8</sub> <sup>2+</sup> <i>D</i> <sub>2</sub> #5  | <i>D</i> <sub>4</sub> #2                   | <i>D</i> <sub>4</sub> #2                 | <i>D</i> <sub>4</sub> #2             |
| Sn(H <sub>2</sub> O) <sub>8</sub> <sup>2+</sup> <i>D</i> <sub>2</sub> #7  | <i>D</i> <sub>4</sub> #2                   | <i>D</i> <sub>4</sub> #2                 | <i>D</i> <sub>4</sub> #2             |
| Sn(H <sub>2</sub> O) <sub>8</sub> <sup>2+</sup> <i>C</i> <sub>2h</sub> #2 | <i>C</i> <sub>4h</sub> #1                  | <i>C</i> <sub>4h</sub> #1                | <i>C</i> <sub>4h</sub> #1            |
| Sn(H <sub>2</sub> O) <sub>8</sub> <sup>2+</sup> <i>C</i> <sub>2</sub> #1  | [4+4]                                      | [4+4]                                    | [4+4]                                |
| Sn(H <sub>2</sub> O) <sub>8</sub> <sup>2+</sup> <i>C</i> <sub>2</sub> #3  | [4+4]                                      | n/a                                      | n/a                                  |

|                                                         |                                            |                                          |                                      |
|---------------------------------------------------------|--------------------------------------------|------------------------------------------|--------------------------------------|
| $\text{Sn}(\text{H}_2\text{O})_8^{2+} C_2 \#6$          | n/a                                        | [4+4]                                    | n/a                                  |
| $\text{Sn}(\text{H}_2\text{O})_8^{2+} C_2 \#7$          | [4+2+2]                                    | n/a                                      | n/a                                  |
|                                                         | HF/gen (5d)<br>M: CEP-121G*<br>OH: 6-31+G* | HF/gen (5d)<br>M: LANL2DZ<br>OH: 6-31+G* | HF/gen (5d)<br>M: SDD<br>OH: 6-31+G* |
| $\text{Sn}(\text{H}_2\text{O})_9^{2+} D_{3h} \#1$       | -687.0656619                               | -687.0391834                             | -687.0389503                         |
| $\text{Sn}(\text{H}_2\text{O})_9^{2+} D_{3h} \#2$       | -687.0441565                               | -687.0173684                             | -687.0183389                         |
| $\text{Sn}(\text{H}_2\text{O})_9^{2+} D_{3h} \#3$       | -687.0536678                               | -687.0273827                             | -687.0266820                         |
| $\text{Sn}(\text{H}_2\text{O})_9^{2+} D_{3h} \#4$       | -687.0692998                               | -687.0430928                             | -687.0427101                         |
| $\text{Sn}(\text{H}_2\text{O})_9^{2+} D_3 \#1$          | -687.0781885                               | -687.0520737                             | -687.0512385                         |
| $\text{Sn}(\text{H}_2\text{O})_9^{2+} D_3 \#2$          | $D_3 \#1$                                  | $D_3 \#1$                                | $D_3 \#1$                            |
| $\text{Sn}(\text{H}_2\text{O})_9^{2+} D_3 \#3$          | [6+3]                                      | [6+3]                                    | [6+3]                                |
| $\text{Sn}(\text{H}_2\text{O})_9^{2+} D_3 \#4$          | $D_3 \#1$                                  | $D_3 \#1$                                | $D_3 \#1$                            |
| $\text{Sn}(\text{H}_2\text{O})_9^{2+} D_3 [6+3]$        | -687.1036718                               | -687.0778981                             | -687.0762446                         |
| $\text{Sn}(\text{H}_2\text{O})_9^{2+} C_{3h} \#1$       | -687.0742064                               | -687.0482271                             | -687.0478293                         |
| $\text{Sn}(\text{H}_2\text{O})_9^{2+} C_{3h} \#2$       | -687.0721906                               | -687.0462267                             | -687.0454698                         |
| $\text{Sn}(\text{H}_2\text{O})_9^{2+} C_{3h} \#3$       | $C_{3h} \#1$                               | $C_{3h} \#1$                             | $C_{3h} \#1$                         |
| $\text{Sn}(\text{H}_2\text{O})_9^{2+} C_{3h} \#4$       | $C_{3h} \#2$                               | $C_{3h} \#2$                             | $C_{3h} \#2$                         |
| $\text{Sn}(\text{H}_2\text{O})_9^{2+} C_{3v} \#1$       | -687.0658985                               | -687.0400072                             | -687.0389565                         |
| $\text{Sn}(\text{H}_2\text{O})_9^{2+} C_{3v} \#2$       | [6+3]                                      | [6+3]                                    | [6+3]                                |
| $\text{Sn}(\text{H}_2\text{O})_9^{2+} C_{3v} \#3$       | [6+3]                                      | [6+3]                                    | [6+3]                                |
| $\text{Sn}(\text{H}_2\text{O})_9^{2+} C_{3v} \#4$       | -687.0694762                               | -687.0436471                             | -687.0427902                         |
| $\text{Sn}(\text{H}_2\text{O})_9^{2+} C_{3v} \#2 [6+3]$ | -687.0854922                               | 687.0619449                              | -687.0568420                         |
| $\text{Sn}(\text{H}_2\text{O})_9^{2+} C_{3v} \#3 [6+3]$ | -687.0868066                               | -687.0622692                             | -687.0593310                         |
| $\text{Sn}(\text{H}_2\text{O})_9^{2+} C_3 \#1$          | $C_3 \#1 [6+3]$                            | $C_3 \#1 [6+3]$                          | $C_3 \#1 [6+3]$                      |
| $\text{Sn}(\text{H}_2\text{O})_9^{2+} C_3 \#2$          | $C_3 \#1 [6+3]$                            | $C_3 \#3 [6+3]$                          | $C_3 \#3 [6+3]$                      |
| $\text{Sn}(\text{H}_2\text{O})_9^{2+} C_3 \#3$          | $C_3 \#3 [6+3]$                            | $C_3 \#3 [6+3]$                          | $C_3 \#3 [6+3]$                      |
| $\text{Sn}(\text{H}_2\text{O})_9^{2+} C_3 \#4$          | $C_3 \#1 [6+3]$                            | $C_3 \#1 [6+3]$                          | $C_3 \#1 [6+3]$                      |
| $\text{Sn}(\text{H}_2\text{O})_9^{2+} C_3 \#5$          | $C_3 \#1 [6+3]$                            | $C_3 \#1 [6+3]$                          | $C_3 \#1 [6+3]$                      |
| $\text{Sn}(\text{H}_2\text{O})_9^{2+} C_3 \#1 [6+3]$    | -687.0994801                               | -687.0758798                             | -687.0708478                         |
| $\text{Sn}(\text{H}_2\text{O})_9^{2+} C_3 \#3 [6+3]$    | <b>-687.0915359</b>                        | <b>-687.0673880</b>                      | -687.0623748                         |
| $\text{Sn}(\text{H}_2\text{O})_{18}^{2+} T [6+12]$      | -1371.4522700                              | -1371.4266810                            | -1371.4242523                        |

Figure S1: Some stationary point (non-minimum) energy structures of aquatin(II).

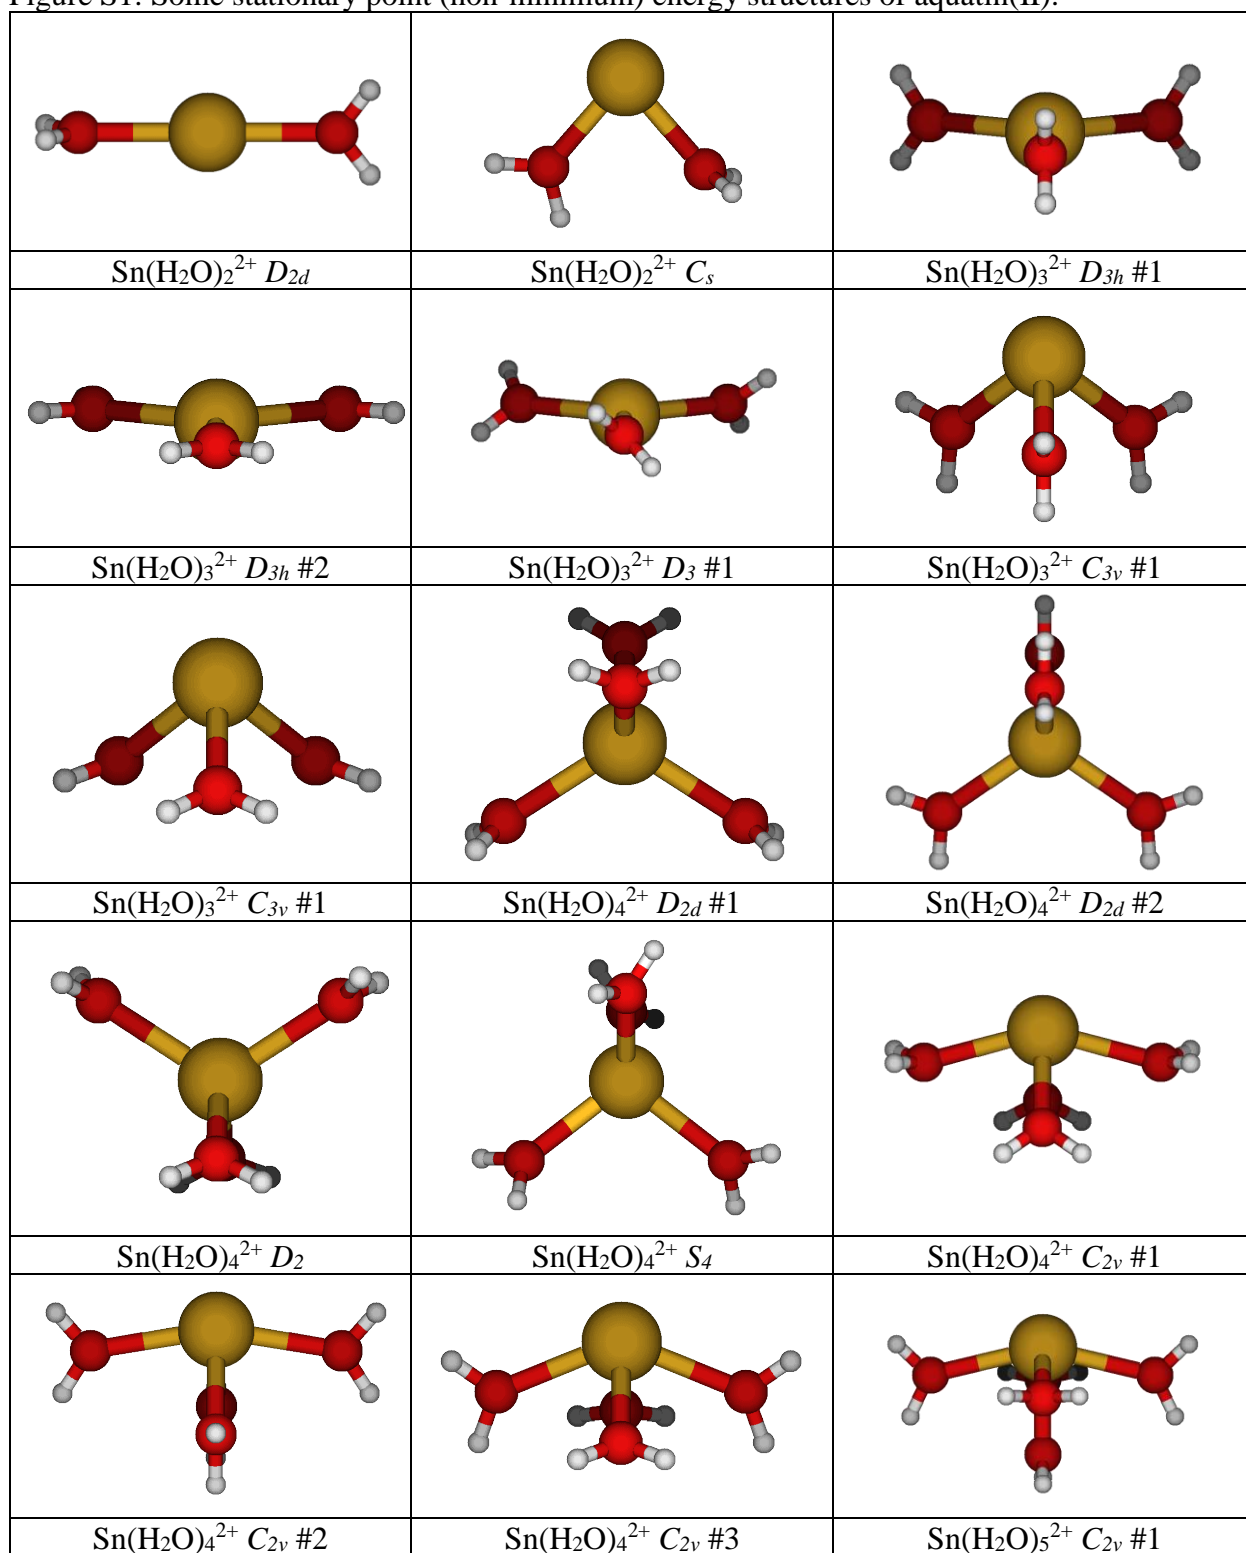

|                                                                        |                                                                         |                                                                      |
|------------------------------------------------------------------------|-------------------------------------------------------------------------|----------------------------------------------------------------------|
|                                                                        |                                                                         |                                                                      |
| $\text{Sn}(\text{H}_2\text{O})_5^{2+} C_{2v} \#2$                      | $\text{Sn}(\text{H}_2\text{O})_5^{2+} C_{2v} \#3$                       | $\text{Sn}(\text{H}_2\text{O})_5^{2+} C_{2v} \#4$                    |
|                                                                        |                                                                         |                                                                      |
| $\text{Sn}(\text{H}_2\text{O})_4^{2+} + \text{H}_2\text{O} C_{2v} \#1$ | $\text{Sn}(\text{H}_2\text{O})_4^{2+} + \text{H}_2\text{O} C_{2v} \#2$  | $\text{Sn}(\text{H}_2\text{O})_4^{2+} + \text{H}_2\text{O} C_2 \#1$  |
|                                                                        |                                                                         |                                                                      |
| $\text{Sn}(\text{H}_2\text{O})_4^{2+} + \text{H}_2\text{O} C_s \#1$    | $\text{Sn}(\text{H}_2\text{O})_6^{2+} T_h$                              | $\text{Sn}(\text{H}_2\text{O})_6^{2+} S_6$                           |
|                                                                        |                                                                         |                                                                      |
| $\text{Sn}(\text{H}_2\text{O})_5^{2+} + \text{H}_2\text{O} C_s \#1$    | $\text{Sn}(\text{H}_2\text{O})_4^{2+} + 2\text{H}_2\text{O} C_{2v} \#1$ | $\text{Sn}(\text{H}_2\text{O})_4^{2+} + 2\text{H}_2\text{O} C_s \#1$ |



|                                                                                     |                                                                                     |                                                                                       |
|-------------------------------------------------------------------------------------|-------------------------------------------------------------------------------------|---------------------------------------------------------------------------------------|
| 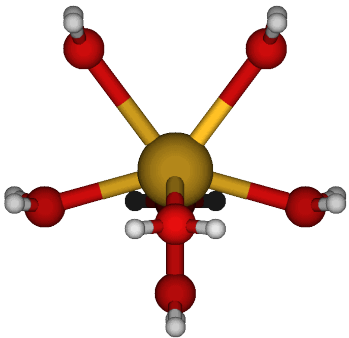   |    |    |
| $\text{Sn}(\text{H}_2\text{O})_7^{2+} \text{ } C_{2v} \text{ \#5}$                  | $\text{Sn}(\text{H}_2\text{O})_7^{2+} \text{ } C_{2v} \text{ \#6}$                  | $\text{Sn}(\text{H}_2\text{O})_7^{2+} \text{ } C_{2v} \text{ \#7}$                    |
|    |    |    |
| $\text{Sn}(\text{H}_2\text{O})_7^{2+} \text{ } C_{2v} \text{ \#8}$                  | $\text{Sn}(\text{H}_2\text{O})_7^{2+} \text{ } C_{2v} \text{ \#9}$                  | $\text{Sn}(\text{H}_2\text{O})_7^{2+} \text{ } C_{2v} \text{ \#10}$                   |
|  |  |  |
| $\text{Sn}(\text{H}_2\text{O})_7^{2+} \text{ } C_{2v} \text{ \#12}$                 | $\text{Sn}(\text{H}_2\text{O})_7^{2+} \text{ } C_{2v} \text{ \#13}$                 | $\text{Sn}(\text{H}_2\text{O})_7^{2+} \text{ } C_{2v} \text{ \#14}$                   |
|  |  |  |
| $\text{Sn}(\text{H}_2\text{O})_7^{2+} \text{ } C_{2v} \text{ \#15}$                 | $\text{Sn}(\text{H}_2\text{O})_7^{2+} \text{ } C_{2v} \text{ \#16}$                 | $\text{Sn}(\text{H}_2\text{O})_7^{2+} \text{ } C_2 \text{ \#10}$                      |

|                                                                                           |                                                                                           |                                                                                          |
|-------------------------------------------------------------------------------------------|-------------------------------------------------------------------------------------------|------------------------------------------------------------------------------------------|
| 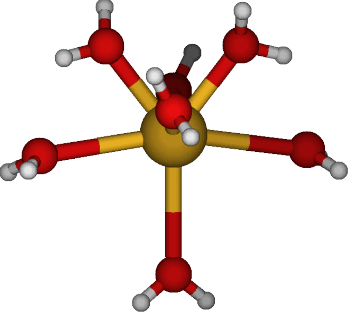         |          |       |
| $\text{Sn}(\text{H}_2\text{O})_7^{2+} \text{ } C_2 \text{ \#15}$                          | $\text{Sn}(\text{H}_2\text{O})_5^{2+} + 2\text{H}_2\text{O} \text{ } C_{2v} \text{ \#1}$  | $\text{Sn}(\text{H}_2\text{O})_5^{2+} + 2\text{H}_2\text{O} \text{ } C_{2v} \text{ \#2}$ |
|          |          |       |
| $\text{Sn}(\text{H}_2\text{O})_5^{2+} + 2\text{H}_2\text{O} \text{ } C_{2v} \text{ \#3}$  | $\text{Sn}(\text{H}_2\text{O})_5^{2+} + 2\text{H}_2\text{O} \text{ } C_{2v} \text{ \#4}$  | $\text{Sn}(\text{H}_2\text{O})_5^{2+} + 2\text{H}_2\text{O} \text{ } C_{2v} \text{ \#9}$ |
|         |         |      |
| $\text{Sn}(\text{H}_2\text{O})_5^{2+} + 2\text{H}_2\text{O} \text{ } C_{2v} \text{ \#10}$ | $\text{Sn}(\text{H}_2\text{O})_5^{2+} + 2\text{H}_2\text{O} \text{ } C_{2v} \text{ \#12}$ | $\text{Sn}(\text{H}_2\text{O})_8^{2+} \text{ } D_{4h} \text{ \#1}$                       |
|        |        |     |
| $\text{Sn}(\text{H}_2\text{O})_8^{2+} \text{ } D_{4h} \text{ \#2}$                        | $\text{Sn}(\text{H}_2\text{O})_8^{2+} \text{ } D_{4d} \text{ \#1}$                        | $\text{Sn}(\text{H}_2\text{O})_8^{2+} \text{ } D_{4d} \text{ \#2}$                       |

|                                                           |                                                           |                                                                           |
|-----------------------------------------------------------|-----------------------------------------------------------|---------------------------------------------------------------------------|
|                                                           |                                                           |                                                                           |
| $\text{Sn}(\text{H}_2\text{O})_8^{2+} S_8 \text{ \#1}$    | $\text{Sn}(\text{H}_2\text{O})_8^{2+} D_4 \text{ \#2}$    | $\text{Sn}(\text{H}_2\text{O})_8^{2+} C_{4v} \text{ \#1}$                 |
|                                                           |                                                           |                                                                           |
| $\text{Sn}(\text{H}_2\text{O})_8^{2+} C_{4v} \text{ \#2}$ | $\text{Sn}(\text{H}_2\text{O})_8^{2+} C_{4v} \text{ \#4}$ | $\text{Sn}(\text{H}_2\text{O})_8^{2+} C_{4h} \text{ \#1}$                 |
|                                                           |                                                           |                                                                           |
| $\text{Sn}(\text{H}_2\text{O})_8^{2+} D_{2h} \text{ \#2}$ | $\text{Sn}(\text{H}_2\text{O})_8^{2+} D_{2h} \text{ \#3}$ | $\text{Sn}(\text{H}_2\text{O})_8^{2+} D_{2d} \text{ \#1}$                 |
|                                                           |                                                           |                                                                           |
| $\text{Sn}(\text{H}_2\text{O})_8^{2+} D_{2d} \text{ \#2}$ | $\text{Sn}(\text{H}_2\text{O})_8^{2+} D_{2d} \text{ \#4}$ | $\text{Sn}(\text{H}_2\text{O})_8^{2+} D_{2d} \text{ \#5/S}_4 \text{ \#2}$ |

|                                                                    |                                                                    |                                                                      |
|--------------------------------------------------------------------|--------------------------------------------------------------------|----------------------------------------------------------------------|
|                                                                    |                                                                    |                                                                      |
| $\text{Sn}(\text{H}_2\text{O})_8^{2+} \text{ } C_{2v} \text{ \#1}$ | $\text{Sn}(\text{H}_2\text{O})_8^{2+} \text{ } C_4 \text{ \#2}$    | $\text{Sn}(\text{H}_2\text{O})_8^{2+} \text{ } D_2 \text{ \#1}$      |
|                                                                    |                                                                    |                                                                      |
| $\text{Sn}(\text{H}_2\text{O})_9^{2+} \text{ } D_{3h} \text{ \#1}$ | $\text{Sn}(\text{H}_2\text{O})_9^{2+} \text{ } D_{3h} \text{ \#2}$ | $\text{Sn}(\text{H}_2\text{O})_9^{2+} \text{ } D_{3h} \text{ \#3}$   |
|                                                                    |                                                                    |                                                                      |
| $\text{Sn}(\text{H}_2\text{O})_9^{2+} \text{ } D_{3h} \text{ \#4}$ | $\text{Sn}(\text{H}_2\text{O})_9^{2+} \text{ } D_3 \text{ \#1}$    | $\text{Sn}(\text{H}_2\text{O})_9^{2+} \text{ } D_3 \text{ [6+3]}$    |
|                                                                    |                                                                    |                                                                      |
| $\text{Sn}(\text{H}_2\text{O})_9^{2+} \text{ } C_{3h} \text{ \#1}$ | $\text{Sn}(\text{H}_2\text{O})_9^{2+} \text{ } C_{3h} \text{ \#2}$ | $\text{Sn}(\text{H}_2\text{O})_9^{2+} \text{ } C_{3h} \text{ [6+3]}$ |

|                                                                                   |                                                                                   |                                                                                     |
|-----------------------------------------------------------------------------------|-----------------------------------------------------------------------------------|-------------------------------------------------------------------------------------|
| 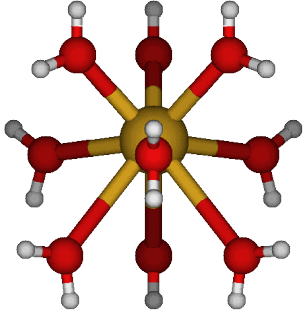 |  |  |
| $\text{Sn}(\text{H}_2\text{O})_9^{2+} C_{3v} \text{ \#1}$                         | $\text{Sn}(\text{H}_2\text{O})_9^{2+} C_{3v} \text{ \#4}$                         | $\text{Sn}(\text{H}_2\text{O})_9^{2+} C_{3v} \text{ \#2 [6+3]}$                     |
|  |  |                                                                                     |
| $\text{Sn}(\text{H}_2\text{O})_9^{2+} C_{3v} \text{ \#3 [6+3]}$                   | $\text{Sn}(\text{H}_2\text{O})_{18}^{2+} T \text{ [6+12]}$                        |                                                                                     |
